# Supplementary material for: Radical C-glycosylation reaction of pyranosides with the 2,3-trans carbamate group
Source: Royal Society of Chemistry journal article supplement (doi:10.1039/c1cc13172a), 2011-01-01

## Supporting Information

**General Procedures.** All chemicals were reagent grade and were used as supplied. Technical grade or reagent grade solvents for extraction and chromatography were used without further purification. Silica gel 60 F<sub>254</sub> plates (E. Merck) were used for analytical and preparative thin-layer chromatography. Silica gel 60N (spherical, neutral, Kanto Chemical Co., Inc, Tokyo) was used for flash column chromatography (40-100 mm) and open column (100-200 mm) chromatography. <sup>1</sup>H and <sup>13</sup>C NMR spectra were recorded at ambient temperature (23~24 °C) in CDCl<sub>3</sub> using JEOL EX 400 MHz spectrometer. <sup>13</sup>C-NMR spectra were taken in CDCl<sub>3</sub> unless otherwise mentioned, and CHCl<sub>3</sub> (δ 77.0 ppm) was used as an internal standard. Chemical shifts are reported in ppm relative to internal tetramethylsilane (δ = 0.00 ppm or CHCl<sub>3</sub> as 7.26 ppm) for <sup>1</sup>H and internal CDCl<sub>3</sub> (δ = 77.00 ppm) for <sup>13</sup>C NMR spectra. Optical rotations were measured with a JASCO DIP-310 polarimeter. MALDI-TOF MS spectra were measured by Shimadzu AXIMA-CFR using DHBA and CHCA as matrix.

### General procedure for preparation of glycosyl bromide from thioglycoside

To a solution of thioglycoside (1 equiv.) in CH<sub>2</sub>Cl<sub>2</sub>, Br<sub>2</sub> solution (1 M in CH<sub>2</sub>Cl<sub>2</sub>, 1.2 equiv.) was dropped at 4 °C. The mixture was stirred at 4 °C-room temperature under N<sub>2</sub> atmosphere (normally 30 min ~ 2 h). After consuming the thioglycoside, the reaction was quenched with 10% Na<sub>2</sub>S<sub>2</sub>O<sub>3</sub> aq. and the aqueous layer was extracted with EtOAc. The combined layers were washed with sat. NaHCO<sub>3</sub> and brine. After drying the mixture over Na<sub>2</sub>SO<sub>4</sub>. The mixture was filtered and concentrated. The residue was purified by silica gel column chromatography.

Yields **1a** (94%), **1b** (93%), **1c** (44%), **6a** (46%), **6b** (95%), **6c** (94%), **9** (94%).

### General Procedure for Keck reaction;

A mixture of bromide (1 equiv.), allyl-*n*-tributylstannane (12 equiv.) and AIBN (15.5 mg/substrate mmol) in PhH (0.2 M solution) was refluxed under N<sub>2</sub> atmosphere for 12 h. The mixture was purified by silica gel column chromatography. The α/β ratio is based on integration of <sup>1</sup>H-NMR.

### General Procedure for chain reaction:

To a solution of bromide (1 equiv.), Bu<sub>3</sub>SnH (2 equiv) and olefin (15 equiv) in PhH

(substrate concentration 0.2 M), AIBN (16.8 mg/substrate mmol) was added. The mixture was refluxed under N<sub>2</sub> atmosphere for 12 h. After cooling the mixture to room temperature, the mixture was purified by silica gel column chromatography. The  $\alpha/\beta$  ratio is based on integration of <sup>1</sup>H-NMR.

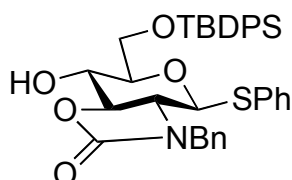

#### Phenyl

*N*-benzyl-2-amino-4,6-*O*-benzylidene-2,3-*N,O*-carbonyl-2-deoxy-1-thio- $\alpha$ -D-glucopyranoside<sup>1</sup> (3.00g, 6.31 mmol) in AcOH (16 mL) and H<sub>2</sub>O (4 mL) was stirred at 100 °C for 2 h. After concentration, the residue was filtered and washed with ether. The precipitate was dissolved in DMF (10 mL) and imidazole (858 mg, 12.62 mmol) was added. To a solution, TBDPSCl (1.93mL, 7.57 mmol) was dropped. The mixture was stirred at room temperature under N<sub>2</sub> atmosphere overnight. The solution was diluted with EtOAc and washed with sat. NH<sub>4</sub>Cl, sat. NaHCO<sub>3</sub> and brine. After concentration, the residue was purified by silica gel column chromatography (hexane:EtOAc 7:3-1:1) to give product (3.08 g, 78%).

<sup>1</sup>H-NMR  $\delta$  7.67-7.65 (m, 4H), 7.42-7.18 (m, 16H), 4.78-4.68 (m, 3H), 4.11-4.06 (m, 2H), 3.93 (s, 1H), 3.91 (s, 1H), 3.51 (m, 1H), 3.41-3.36 (m, 1H), 1.04 (s, 9H); <sup>13</sup>C-NMR  $\delta$  150.9, 136.3, 135.6, 135.5, 132.4, 132.0, 129.9, 129.0, 128.6, 128.2, 128.1, 127.8, 127.8, 127.5, 86.8, 82.4, 80.5, 69.0, 64.0, 60.2, 47.7, 26.8, 19.3;  $[\alpha]$  -54.5 (*c* 0.73, CHCl<sub>3</sub>); calcd for [C<sub>36</sub>H<sub>39</sub>NO<sub>5</sub>SSi+Na]<sup>+</sup> 648.2210, found 648.2217.

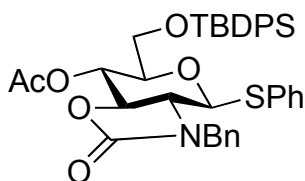

To a solution of alcohol (2.00 g, 3.20 mmol) in pyridine (5 mL), Ac<sub>2</sub>O (3 mL) was added. After 2 h, the reaction was concentrated *in vacuo*. The residue was purified by silica gel column chromatography (hexane:EtOAc 7:3) to give product (2.00 g, 94%).

<sup>1</sup>H-NMR  $\delta$  7.66-7.63 (m, 4H), 7.40-7.18 (m, 16H), 5.30 (t, *J* = 8.8 Hz, 1H), 4.79-4.72 (m,

3H), 4.13 (t,  $J = 10.4$  Hz, 1H), 3.75-3.73 (m, 2H), 3.57 (m, 1H), 3.53 (t,  $J = 10.0$  Hz, 1H), 1.95 (s, 3H), 1.02 (s, 9H);  $^{13}\text{C}$ -NMR  $\delta$  168.9, 158.6, 136.1, 135.6, 135.5, 132.8, 132.8, 132.3, 132.3, 129.7, 129.1, 128.6, 128.3, 128.1, 127.7, 127.6, 86.8, 80.3, 67.2, 62.6, 60.4, 47.7, 26.7, 20.6, 19.3;  $[\alpha] -37.1$  ( $c$  0.56,  $\text{CHCl}_3$ ); calcd for  $[\text{C}_{38}\text{H}_{41}\text{NO}_6\text{SSi}+\text{Na}]^+$  690.2316, found 690.2326.

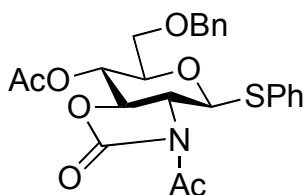

To a solution of phenyl 2-amino-6-*O*-benzyl-2,3-*N,O*-carbonyl-2-deoxy-1-thio- $\alpha$ -D-glucopyranoside (1.00 g, 2.60 mmol)<sup>2,3</sup> in pyridine (3 mL),  $\text{Ac}_2\text{O}$  (2 mL) and DMAP (50 mg, 0.41 mmol) was added. After stirring at room temperature overnight, the reaction mixture was concentrated. The residue was purified by silica gel column chromatography (hexane: EtOAc 7:3) to give the product (1.20 g, 95%).

$^1\text{H}$ -NMR  $\delta$  7.52-7.50 (m, 2H), 7.32-7.19 (m, 8H), 5.33 (t,  $J = 8.4$  Hz, 1H), 4.95 (d,  $J = 7.6$  Hz, 1H), 4.53 (d,  $J = 12.0$  Hz, 1H), 4.46 (d,  $J = 12.0$  Hz, 1H), 4.24 (d,  $J = 10.8$  Hz, 1H), 4.22 (d,  $J = 10.8$  Hz, 1H), 3.72 (m, 1H), 3.65 (s, 1H), 3.63 (s, 1H), 2.55 (s, 3H), 2.02 (s, 3H);  $^{13}\text{C}$  NMR  $\delta$  172.5, 169.1, 153.2, 137.5, 134.1, 132.0, 128.8, 128.3, 127.8, 127.7, 87.4, 79.3, 79.1, 76.7, 73.6, 68.9, 68.4, 59.8, 24.8, 20.7;  $[\alpha] -55.2$  ( $c$  1.4,  $\text{CHCl}_3$ ); calcd for  $[\text{C}_{24}\text{H}_{25}\text{NO}_7\text{SNa}]^+$  494.1244, found 494.1243.

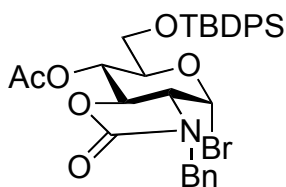

$^1\text{H}$ -NMR  $\delta$  7.56-7.54 (m, 4H), 7.40-7.15 (m, 11H), 6.24 (d,  $J = 3.2$  Hz, 1H) 5.44 (t,  $J = 10.0$  Hz, 1H), 4.78 (d,  $J = 14.8$  Hz, 1H), 4.63 (t,  $J = 11.6$  Hz, 1H), 4.09 (d,  $J = 14.8$  Hz, 1H), 3.80 (m, 1H), 3.70 (m, 2H), 3.27 (dd,  $J = 11.2, 2.8$  Hz, 1H), 1.98 (s, 3H), 1.01 (s, 9H);  $^{13}\text{C}$ -NMR  $\delta$  168.7, 159.6, 135.5, 133.7, 132.7, 132.6, 129.8, 129.7, 129.1, 129.0, 128.9, 128.7, 128.1, 127.7, 127.6, 83.9, 75.8, 66.8, 61.2, 61.0, 47.8, 26.8, 20.6, 19.3; calcd for  $[\text{C}_{33}\text{H}_{37}\text{NO}_7\text{SSi}+\text{Na}]^+$  642.1952, found 642.1950.

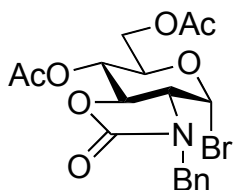

$^1\text{H-NMR}$   $\delta$  7.38-7.36 (m, 3H), 7.28-7.26 (m, 2H), 6.21 (d,  $J = 3.2$  Hz, 1H), 5.30 (t,  $J = 10.0$  Hz, 1H), 4.80 (d,  $J = 14.4$  Hz, 1H), 4.65 (t,  $J = 10.0$  Hz, 1H), 4.27 (dd,  $J = 12.8, 4.4$  Hz, 1H), 4.09-4.04 (m, 2H), 4.01 (m, 1H), 3.31 (dd,  $J = 11.2, 2.8$  Hz, 1H), 2.10 (s, 3H), 2.03 (s, 3H);  $^{13}\text{C-NMR}$   $\delta$  170.1, 168.8, 157.3, 133.5, 129.1, 128.8, 128.7, 83.0, 75.3, 74.1, 66.8, 60.8, 47.8, 20.8;  $[\alpha]$  194.0 ( $c$  1.1,  $\text{CHCl}_3$ ); calcd for  $[\text{C}_{18}\text{H}_{20}\text{BrNO}_7+\text{Na}]^+$  464.0315, found 464.0314.

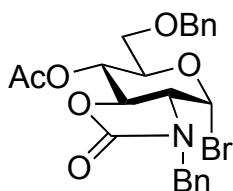

$^1\text{H-NMR}$   $\delta$  7.36-7.17 (m, 10H), 6.24 (d,  $J = 3.2$  Hz, 1H), 5.43 (t,  $J = 9.6$  Hz, 1H), 4.80 (d,  $J = 14.8$  Hz, 1H), 4.62 (t,  $J = 10.4$  Hz, 1H), 4.53 (d,  $J = 12.0$  Hz, 1H), 4.39 (d,  $J = 12.0$  Hz, 1H), 3.90 (d,  $J = 14.8$  Hz, 1H), 3.89 (m, 1H), 3.54-3.47 (m, 2H), 3.33 (d,  $J = 11.6, 3.2$  Hz, 1H), 1.97 (t, 3H);  $^{13}\text{C-NMR}$   $\delta$  168.7, 157.5, 136.9, 133.7, 129.2, 129.0, 128.8, 128.7, 128.4, 128.1, 128.0, 127.9, 83.7, 75.7, 75.2, 73.6, 67.0, 66.4, 60.7, 47.7, 20.6;  $[\alpha]$  121.2 ( $c$  1.85,  $\text{CHCl}_3$ ); calcd for  $[\text{C}_{29}\text{H}_{29}\text{NO}_5\text{S}+\text{Na}]^+$  526.1659, found 526.1653.

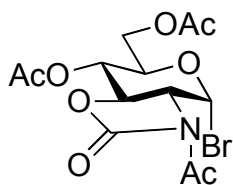

$^1\text{H-NMR}$   $\delta$  7.06 (d,  $J = 3.2$  Hz, 1H), 5.41 (t,  $J = 10.0$  Hz, 1H), 4.76 (t,  $J = 11.6$  Hz, 1H), 4.31 (dd,  $J = 12.8$  Hz, 4.0 Hz, 1H), 4.17 (dd,  $J = 12.8$  Hz, 2.0 Hz, 1H), 4.16 (m, 1H), 3.95 (dd,  $J = 11.6$  Hz, 3.2 Hz, 1H);  $^{13}\text{C-NMR}$   $\delta$  170.8, 170.2, 168.7, 152.5, 83.7, 75.4, 73.8, 66.6, 61.0, 60.7, 23.7, 20.8, 20.7;  $[\alpha]$  159.0 ( $c$  2.56,  $\text{CHCl}_3$ ); calcd for  $[\text{C}_{13}\text{H}_{16}\text{BrNO}_8+\text{Na}]^+$  415.9952, found 415.9953.

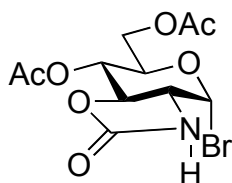

$^1\text{H-NMR}$   $\delta$  6.52 (d,  $J$  = 3.2 Hz, 1H), 5.50 (bs, 1H), 5.43 (t,  $J$  = 10.0 Hz, 1H), 4.75 (t,  $J$  = 11.2 Hz, 1H), 4.30 (dd,  $J$  = 12.4 Hz, 4.4 Hz, 1H), 4.16 (dd,  $J$  = 12.8, 2.0 Hz, 1H), 4.16 (dd,  $J$  = 12.8 Hz, 2.0 Hz, 1H), 4.06 (m, 1H), 3.76 (m, 1H), 2.12 (s, 3H), 2.08 (s, 3H);  $^{13}\text{C-NMR}$   $\delta$  170.2, 168.8, 157.6, 83.6, 77.6, 73.9, 66.9, 60.9, 59.6, 20.8;  $[\alpha]$  149.1 ( $c$  1.50,  $\text{CHCl}_3$ ).

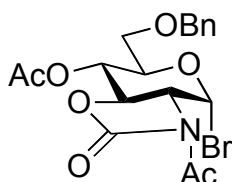

$^1\text{H-NMR}$   $\delta$  7.33-7.15 (m, 5H), 7.08 (d,  $J$  = 2.8 Hz, 1H), 5.54 (t,  $J$  = 10.0 Hz, 1H), 4.74 (t,  $J$  = 10.8 Hz, 1H), 4.58 (d,  $J$  = 12.0 Hz, 1H), 4.46 (d,  $J$  = 12.0 Hz, 1H), 3.97-3.91 (m, 2H), 3.60-3.57 (m, 2H), 2.49 (s, 3H), 2.01 (s, 3H);  $^{13}\text{C-NMR}$   $\delta$  170.8, 168.6, 151.9, 137.0, 128.8, 128.4, 128.1, 127.9, 125.2, 84.4, 75.8, 75.1, 73.6, 66.9, 66.5, 60.9, 23.7, 20.9;  $[\alpha]$  242.8 ( $c$  2.25,  $\text{CHCl}_3$ ); calcd for  $[\text{C}_{18}\text{H}_{20}\text{BrNO}_7+\text{Na}]^+$  464.0315, found 464.0307.

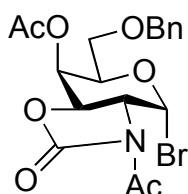

$^1\text{H-NMR}$   $\delta$  7.34-7.27 (m, 4H), 7.10 (d,  $J$  = 2.8 Hz, 1H), 5.72 (s, 1H), 4.80 (dd,  $J$  = 2.4 Hz, 1H), 4.53 (d,  $J$  = 11.6 Hz, 1H), 4.42 (d,  $J$  = 11.6 Hz, 1H), 4.25 (dd,  $J$  = 12.0, 2.8 Hz, 1H), 4.21 (t,  $J$  = 6.4 Hz, 1H), 3.54 (m, 2H), 2.50 (s, 3H), 2.05 (s, 3H);  $^{13}\text{C-NMR}$   $\delta$  171.4, 168.8, 152.0, 137.0, 128.5, 128.0, 127.9, 85.8, 76.1, 74.0, 73.7, 73.3, 66.7, 65.1, 56.9, 23.8, 20.6;  $[\alpha]$  162.0 ( $c$  0.80,  $\text{CHCl}_3$ ); calcd for  $[\text{C}_{18}\text{H}_{20}\text{BrNO}_7+\text{Na}]^+$  426.1523, found 426.1527.

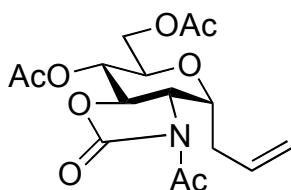

$^1\text{H-NMR}$   $\delta$  5.74 (m, 1H), 5.19 (t,  $J=9.6$  Hz, 1H), 5.13-5.09 (m, 2H), 4.92 (m, 1H), 4.37 (t,  $J=12.4$  Hz, 1H), 4.20-4.11 (m, 2H), 4.05 (dd,  $J=12.0, 5.2$  Hz, 1H), 3.75 (m, 1H), 2.46 (s, 3H), 2.46 (m, 1H), 2.17 (m, 1H), 2.10 (s, 3H), 2.05 (s, 3H);  $^{13}\text{C-NMR}$   $\delta$  171.4, 170.5, 169.0, 152.7, 132.3, 118.0, 75.3, 73.4, 70.7, 68.6, 62.1, 59.5, 29.5, 23.9, 20.7;  $[\alpha]$  89.9 ( $c$  1.2,  $\text{CHCl}_3$ ); calcd for  $[\text{C}_{16}\text{H}_{21}\text{NO}_8+\text{Na}]^+$  378.1159, found 378.1157.

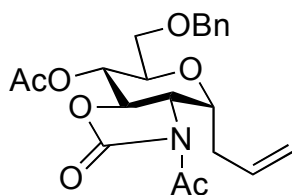

$^1\text{H-NMR}$   $\delta$  7.29-7.19 (m, 5H), 5.76 (m, 1H), 5.25 (t,  $J=9.0$  Hz, 1H), 5.09-5.03 (m, 2H), 4.87 (m, 1H), 4.52 (d,  $J=12.0$  Hz, 1H), 4.42 (d,  $J=12.0$  Hz, 1H), 4.31 (t,  $J=12.2$  Hz, 1H), 4.03 (dd,  $J=12.4$  Hz, 4.8 Hz, 1H), 3.67 (m, 1H), 3.51-3.47 (m, 2H), 2.41 (s, 3H), 2.13 (m, 1H), 1.92 (s, 3H);  $^{13}\text{C-NMR}$   $\delta$  171.3, 168.9, 152.8, 137.4, 132.6, 128.2, 127.8, 127.6, 117.8, 75.6, 73.6, 73.4, 72.4, 69.2, 68.4, 59.3, 29.9, 24.0, 20.8;  $[\alpha]$  126.8 ( $c$  1.86,  $\text{CHCl}_3$ ); calcd for  $[\text{C}_{21}\text{H}_{25}\text{NO}_7+\text{Na}]^+$  426.1523; found 426.1527.

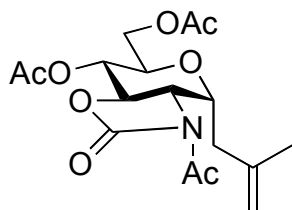

$^1\text{H-NMR}$   $\delta$  5.22 (t,  $J=9.6$  Hz, 1H), 5.04 (m, 1H), 4.84 (s, 1H), 4.76 (s, 1H), 4.38 (t,  $J=10.0$  Hz, 1H), 4.18 (dd,  $J=12.0, 5.2$  Hz, 1H), 4.09 (dd,  $J=12.0, 2.4$  Hz, 1H), 4.05 (dd,  $J=12.4, 5.2$  Hz, 1H), 3.78 (m, 1H), 2.44 (s, 3H), 2.44-2.42 (m, 1H), 2.11 (s, 3H), 2.05 (s, 3H), 2.05-2.00 (m, 1H);  $^{13}\text{C-NMR}$   $\delta$  171.3, 170.5, 169.0, 152.8, 140.4, 113.8, 75.4, 72.4, 70.6, 68.6, 62.2, 59.7, 32.9, 23.9, 21.9, 20.7, 20.7;  $[\alpha]$  105.1 ( $c$  0.84,  $\text{CHCl}_3$ ); calcd for  $[\text{C}_{17}\text{H}_{23}\text{NO}_8+\text{Na}]^+$  392.1316, found 392.1315.

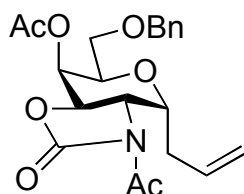

$^1\text{H-NMR}$   $\delta$  7.34-7.24 (m, 5H), 5.73 (m, 1H), 5.08 (s, 1H), 4.96-4.54 (m, 2H), 4.41 (m,

1H), 4.52 (d,  $J = 11.6$  Hz, 1H), 4.43-4.34 (m, 3H), 3.91 (t,  $J = 6.0$  Hz, 1H), 3.48-3.46 (m, 2H), 2.46 (s, 3H), 2.05 (m, 1H), 205 (s, 3H);  $^{13}\text{C-NMR}$   $\delta$  171.6, 169.0, 152.8, 137.3, 132.7, 128.3, 127.8, 127.8, 117.9, 77.2, 74.4, 73.8, 73.6, 69.8, 67.8, 65.9, 55.7, 29.1, 24.2, 20.8;  $[\alpha]$  51.7 ( $c$  1.00,  $\text{CHCl}_3$ ); calcd for  $[\text{C}_{21}\text{H}_{25}\text{NO}_7+\text{Na}]^+$  426.1523, found 426.1520.

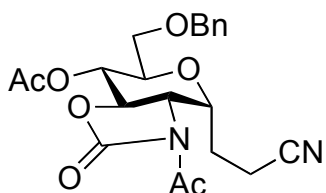

$^1\text{H-NMR}$   $\delta$  7.29-7.19 (m, 5H), 5.26 (t,  $J = 8.4$  Hz, 1H), 4.77 (m, 1H), 4.53 (d,  $J = 12.0$  Hz, 1H), 4.42 (d,  $J = 12.0$  Hz, 1H), 4.22 (t,  $J = 12.4$  Hz, 1H), 4.07 (m, 1H), 3.64 (m, 1H), 3.58-3.50 (m, 2H), 2.43 (s, 3H), 2.39-2.29 (m, 2H), 1.97 (m, 1H), 1.94 (s, 3H), 1.67 (m, 1H);  $^{13}\text{C-NMR}$   $\delta$  171.4, 168.9, 152.5, 137.2, 128.3, 127.8, 118.7, 75.3, 73.7, 73.3, 73.2, 69.1, 68.2, 58.8, 23.4, 21.8, 20.7, 14.2;  $[\alpha]$  87.7 ( $c$  0.90,  $\text{CHCl}_3$ ); calcd for  $[\text{C}_{21}\text{H}_{24}\text{N}_2\text{O}_7+\text{Na}]^+$  439.1476, found 439.1463.

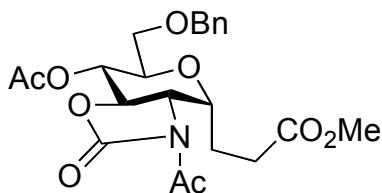

$^1\text{H-NMR}$   $\delta$  7.28-7.19 (m, 5H), 5.25 (t,  $J = 9.2$  Hz, 1H), 4.75 (m, 1H), 4.52 (d,  $J = 12.0$  Hz, 1H), 4.40 (d,  $J = 12.0$  Hz, 1H), 4.30 (t,  $J = 10.0$  Hz, 1H), 4.00 (dd,  $J = 12.4, 5.6$  Hz, 1H), 3.63 (m, 1H), 3.59 (s, 3H), 3.45 (m, 2H), 2.45-2.28 (m, 2H), 2.42 (s, 3H), 2.03 (m, 1H), 1.93 (s, 3H), 1.55 (m, 1H);  $^{13}\text{C-NMR}$   $\delta$  173.0, 171.3, 168.9, 152.8, 137.3, 128.3, 127.8, 127.7, 75.6, 74.0, 73.6, 72.1, 69.0, 68.2, 59.4, 51.9, 30.5, 25.0, 20.8, 20.3;  $[\alpha]$  88.6 ( $c$  1.25,  $\text{CHCl}_3$ ); calcd for  $[\text{C}_{22}\text{H}_{27}\text{NO}_9+\text{Na}]^+$  472.1578, found 472.1572.

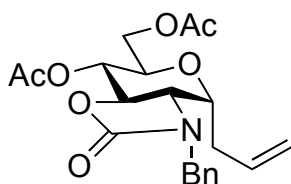

Detectable peak;  $^1\text{H-NMR}$   $\delta$  7.36 (m, 2H), 7.35 (m, 1H), 7.29 (dd,  $J = 8.0, 1.0$  Hz, 2H),

5.60 (dddd,  $J = 17.1, 10.0, 7.0, 6.6$  Hz, 1H), 5.14 (dd,  $J = 10.1$  Hz, 9.6 Hz, 1H), 4.48 (d,  $J = 14.6$  Hz, 1H), 4.28 (d,  $J = 14.6$  Hz, 1H), 4.17 (dd,  $J = 12.6, 5.0$  Hz, 1H), 4.29 (dd,  $J = 12.1$  Hz, 10.1 Hz, 1H), 4.06 (dd,  $J = 12.6, 2.0$  Hz, 1H), 4.06 (ddd,  $J = 11.1, 5.1, 3.1$  Hz, 1H), 3.71 (ddd,  $J = 9.6, 5.0, 2.0$  Hz, 1H), 3.50 (dd,  $J = 12.1, 5.1$  Hz, 1H), 2.10 (s, 3H), 2.04 (s, 3H);  $^{13}\text{C-NMR}$   $\delta$  170.6, 169.2, 158.8, 134.8, 132.6, 129.1, 129.0, 128.6, 118.2, 74.8, 73.7, 70.9, 68.9, 62.2, 60.4, 49.2, 29.3, 20.7, 20.7; calcd for  $[\text{C}_{21}\text{H}_{25}\text{NO}_7 + \text{Na}]^+$  426.1523, found 426.1524.

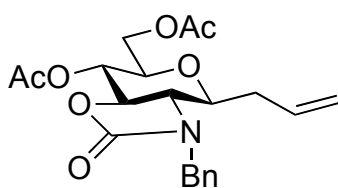

Detectable peak;  $^1\text{H-NMR}$   $\delta$  7.36-7.29 (m, 5H), 5.71 (dddd,  $J = 17.1, 10.1, 6.5, 6.5$  Hz, 1H), 5.23 (dd,  $J = 10.6, 9.1$  Hz, 1H), 5.01 (br,  $J = 10.1$  Hz, 1H), 4.88 (dddd,  $J = 17.1, 1.5, 1.5, 1.5$  Hz, 1H), 4.67 (d,  $J = 16.1$  Hz, 1H), 4.45 (d,  $J = 17.1$  Hz, 1H), 4.21 (dd,  $J = 12.1, 5.1$  Hz, 1H), 4.17 (dd,  $J = 11.6, 10.6$  Hz, 1H), 4.12 (dd,  $J = 12.1, 2.5$  Hz), 3.50 (m, 1H), 3.29 (ss,  $J = 11.6, 9.1$  Hz, 1H), 2.30 (m, 1H), 2.11 (s, 3H), 2.04 (m, 1H), 2.05 (s, 3H),  $^{13}\text{C-NMR}$   $\delta$  159.3, 132.7, 126.9, 118.1, 79.9, 76.7, 67.8, 62.2, 62.1, 48.4, 36.5 20.7, 20.7.

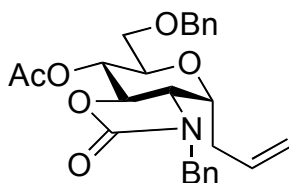

Detectable peak;  $^1\text{H-NMR}$   $\delta$  7.19-7.41 (m, 10H), 5.56-5.70 (m, 1H), 5.24 (t,  $J = 9.6$  Hz, 1H), 5.07 (d,  $J = 10.0$  Hz, 1H), 5.01 (d,  $J = 17.2$  Hz, 1H), 4.53 (d,  $J = 12.0$  Hz, 1H), 4.48 (d,  $J = 14.8$  Hz, 1H), 4.42 (d,  $J = 12.0$  Hz, 1H), 4.26 (t,  $J = 11.2$  Hz, 1H), 4.25 (d,  $J = 14.8$  Hz, 1H), 4.07 (ddd,  $J = 11.2, 4.8, 4.0$  Hz, 1H), 3.64 (ddd,  $J = 8.8, 3.6, 2.8$  Hz, 1H), 3.41-3.58 (m, 3H), 2.35-2.48 (m, 1H), 1.95 (s, 3H), 1.83-2.03 (m, 1H);  $^{13}\text{C-NMR}$   $\delta$  168.8, 158.7, 137.3, 134.6, 132.7, 128.9, 128.8, 128.4, 128.2, 127.8, 127.6, 118.0, 75.2, 73.7, 73.5, 72.0, 69.2, 68.0, 60.2, 49.1, 29.4, 20.8; MALDI-TOFMS: calcd for  $\text{C}_{26}\text{H}_{29}\text{NO}_6\text{Na}$ :474.19  $[\text{M} + \text{Na}]^+$ ; found 474.52.



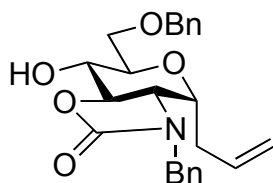

Detectable peak;  $^1\text{H-NMR}$   $\delta$  7.33 (m, 6H), 7.29 (m, 4H), 5.61 (ddd,  $J = 17.2, 10.3, 6.9$  Hz, 1H), 5.05 (br.d.  $J = 10.3$  Hz, 1H), 4.98 (br.d.  $J = 17.2$  Hz, 1H), 4.44 (d,  $J = 14.9$  Hz, 1H), 4.29 (d,  $J = 14.9$  Hz, 1H), 4.20 (dd,  $J = 12.0, 9.8$  Hz, 1H), 4.00 (ddd,  $J = 10.3, 5.2, 3.5$  Hz, 1H), 3.95 (ddd,  $J = 9.8, 8.6, 2.9$  Hz, 1H), 3.70 (dd,  $J = 10.3, 4.0$  Hz, 1H), 3.62 (dd,  $J = 10.3, 4.6$  Hz, 1H), 3.53 (ddd,  $J = 8.6, 4.6, 4.0$  Hz, 1H), 3.39 (dd,  $J = 12.0, 5.2$  Hz, 1H), 2.97 (d,  $J = 2.9$  Hz, 1H), 3.95 (ddd,  $J = 9.8, 8.6, 2.9$  Hz, 1H), 2.40 (br.ddd,  $J = 15.4, 10.3, 6.9$  Hz, 1H), 1.85 (ddd,  $J = 15.4, 6.9, 3.5$  Hz, 1H);  $^{13}\text{C-NMR}$   $\delta$  159.4, 137.3, 135.0, 133.0, 128.9, 128.9, 128.4, 128.3, 127.8, 127.7, 117.8, 77.3, 73.7, 73.6, 72.8, 70.6, 69.6, 60.1, 49.0, 29.3; MALDI-TOFMS: calcd for  $\text{C}_{24}\text{H}_{27}\text{NO}_5$  409.1, found 410.24.

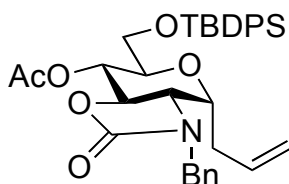

Detectable peak;  $^1\text{H-NMR}$   $\delta$  7.58-7.63 (m, 4H), 7.25-7.45 (m, 11H), 5.60-5.70 (m, 1H), 5.13 (t,  $J = 10.0$  Hz, 1H), 5.05 (dd,  $J = 11.6, 1.2$  Hz, 1H), 4.99 (dd,  $J = 17.2, 1.2$  Hz, 1H), 4.45 (d,  $J = 14.4$  Hz, 1H), 4.31 (d,  $J = 14.4$  Hz, 1H), 4.26 (t,  $J = 10.4$  Hz, 1H), 4.00-4.08 (m, 1H), 3.63-3.68 (m, 2H), 3.54-3.59 (m, 1H), 3.46 (dd,  $J = 12.0, 5.2$  Hz, 1H), 2.35-2.47 (m, 1H), 1.93 (s, 3H), 1.80-1.90 (m, 1H), 1.01 (s, 9H);  $^{13}\text{C-NMR}$   $\delta$  168.8, 158.8, 135.5, 135.4, 134.8, 133.0, 132.9, 132.8, 129.6, 129.5, 128.9, 128.8, 128.3, 127.5, 127.4, 117.9, 75.2, 73.7, 73.5, 69.1, 62.9, 60.6, 49.2, 29.4, 26.8, 20.8, 19.3; MALDI-TOFMS: calcd for  $\text{C}_{35}\text{H}_{41}\text{NO}_6\text{SiNa}$  : 622.26  $[\text{M}+\text{Na}]^+$ ; found 622.69.

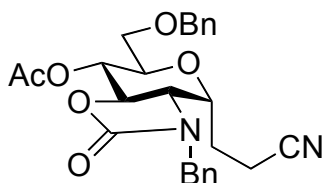

Detectable peak;  $^1\text{H-NMR}$   $\delta$  7.15-7.45 (m, 10H), 5.25 (t,  $J = 9.6$  Hz, 1H), 4.54 (d,  $J = 12.0$  Hz, 1H), 4.42 (d,  $J = 12.0$  Hz, 1H), 4.40 (d,  $J = 14.4$  Hz, 1H), 4.35 (d,  $J = 14.4$  Hz, 1H),

4.15 (t,  $J = 10.8$  Hz, 1H), 3.95-4.05 (m, 1H), 3.45-3.63 (m, 3H), 3.45 (dd,  $J = 10.8, 4.4$  Hz, 1H), 2.20-2.32 (m, 1H), 2.06-2.20 (m, 1H), 2.35-2.48 (m, 1H), 1.96 (s, 3H), 1.83-2.03 (m, 1H), 1.22-1.35 (ddd,  $J = 13.6, 7.6, 5.2$  Hz, 1H);  $^{13}\text{C-NMR}$   $\delta$  168.8, 158.5, 137.1, 134.6, 128.9, 128.6, 128.3, 128.1, 127.8, 127.7, 118.4, 74.9, 73.6, 72.8, 72.6, 68.9, 67.8, 60.2, 49.5, 21.1, 20.7, 14.1; MALDI-TOFMS: calcd for  $\text{C}_{26}\text{H}_{28}\text{N}_2\text{O}_6\text{Na}$ : 487.18  $[\text{M}+\text{Na}]^+$ ; found 487.40.

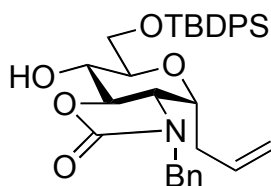

Detectable peak;  $^1\text{H-NMR}$   $\delta$  7.63 (m, 2H), 7.62 (m, 2H), 7.37 (m, 4H), 7.43 (m, 4H), 7.33 (m, 2H), 7.29 (m, 1H), 7.29 (m, 2H), 5.56 (ddt,  $J = 17.2, 10.3, 6.9$  Hz, 1H), 5.00 (br.d,  $J = 10.3$  Hz, 1H), 4.92 (br.d,  $J = 17.2$  Hz, 1H), 4.41 (d,  $J = 14.6$  Hz, 1H), 4.32 (d,  $J = 14.6$  Hz, 1H), 4.20 (dd,  $J = 12.1, 9.8$  Hz, 1H), 3.94 (m, 1H), 3.94 (m, 1H), 3.85 (dd,  $J = 10.6, 4.6$  Hz, 1H), 3.81 (dd,  $J = 10.6, 4.8$  Hz, 1H), 3.45 (ddd,  $J = 9.1, 4.8, 4.6$  Hz, 1H), 3.33 (dd,  $J = 12.1, 5.1$  Hz, 1H), 3.01 (d,  $J = 2.9$  Hz, 1H);  $^{13}\text{C-NMR}$   $\delta$  159.6, 135.2, 132.7, 132.6, 135.6, 135.5, 133.1, 130.0, 129.9, 129.0, 129.0, 128.4, 127.8, 127.8, 117.8, 77.1, 73.7, 73.7, 71.2, 64.7, 60.2, 49.1, 29.4, 26.8, 19.4; calcd for  $\text{C}_{33}\text{H}_{39}\text{NO}_5\text{Si}+\text{Na}$  580.88, found 557.26.

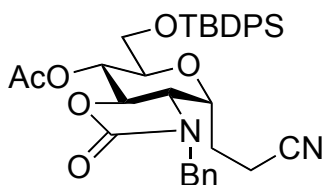

Detectable peak;  $^1\text{H-NMR}$   $\delta$  7.58-7.63 (m, 4H), 7.25-7.45 (m, 11H), 5.17 (t,  $J = 9.2$  Hz, 1H), 4.45 (d,  $J = 14.8$  Hz, 1H), 4.33 (d,  $J = 14.8$  Hz, 1H), 4.14 (t,  $J = 10.0$  Hz, 1H), 3.92-4.01 (m, 1H), 3.67 (d,  $J = 3.6$  Hz, 2H), 3.50 (dd,  $J = 12.4, 5.6$  Hz, 1H), 3.40-3.47 (m, 1H), 2.24-2.32 (m, 1H), 2.05-2.12 (m, 1H), 1.95 (s, 3H), 1.83-1.92 (m, 1H), 1.22-1.35 (m, 1H), 1.02 (s, 9H);  $^{13}\text{C-NMR}$   $\delta$  168.7, 158.5, 135.4, 135.4, 134.8, 132.8, 132.6, 129.7, 129.1, 128.9, 128.6, 127.6, 127.5, 118.2, 75.0, 74.0, 72.3, 68.7, 62.6, 60.5, 49.6, 26.8, 21.2, 20.7, 19.3, 13.8; MALDI-TOFMS: calcd for  $\text{C}_{35}\text{H}_{41}\text{N}_2\text{O}_6\text{Si}$  : 613.27  $[\text{M}+\text{H}]^+$ ; found 613.81.

1. S. Manabe, K. Ishii, Y. Ito, *J. Am. Chem. Soc.*, 2006, **128**, 10666.
2. K. Benakli, C. Zha, R. J. Kerns, *J. Am. Chem. Soc.*, 2001, **123**, 9461.
3. H. Satoh, S. Manabe, Y. Ito, H. P. Lüthi, T. Laino, J., Hutter, *J. Am. Chem. Soc.* **2011**, *133*, 5610-5619.



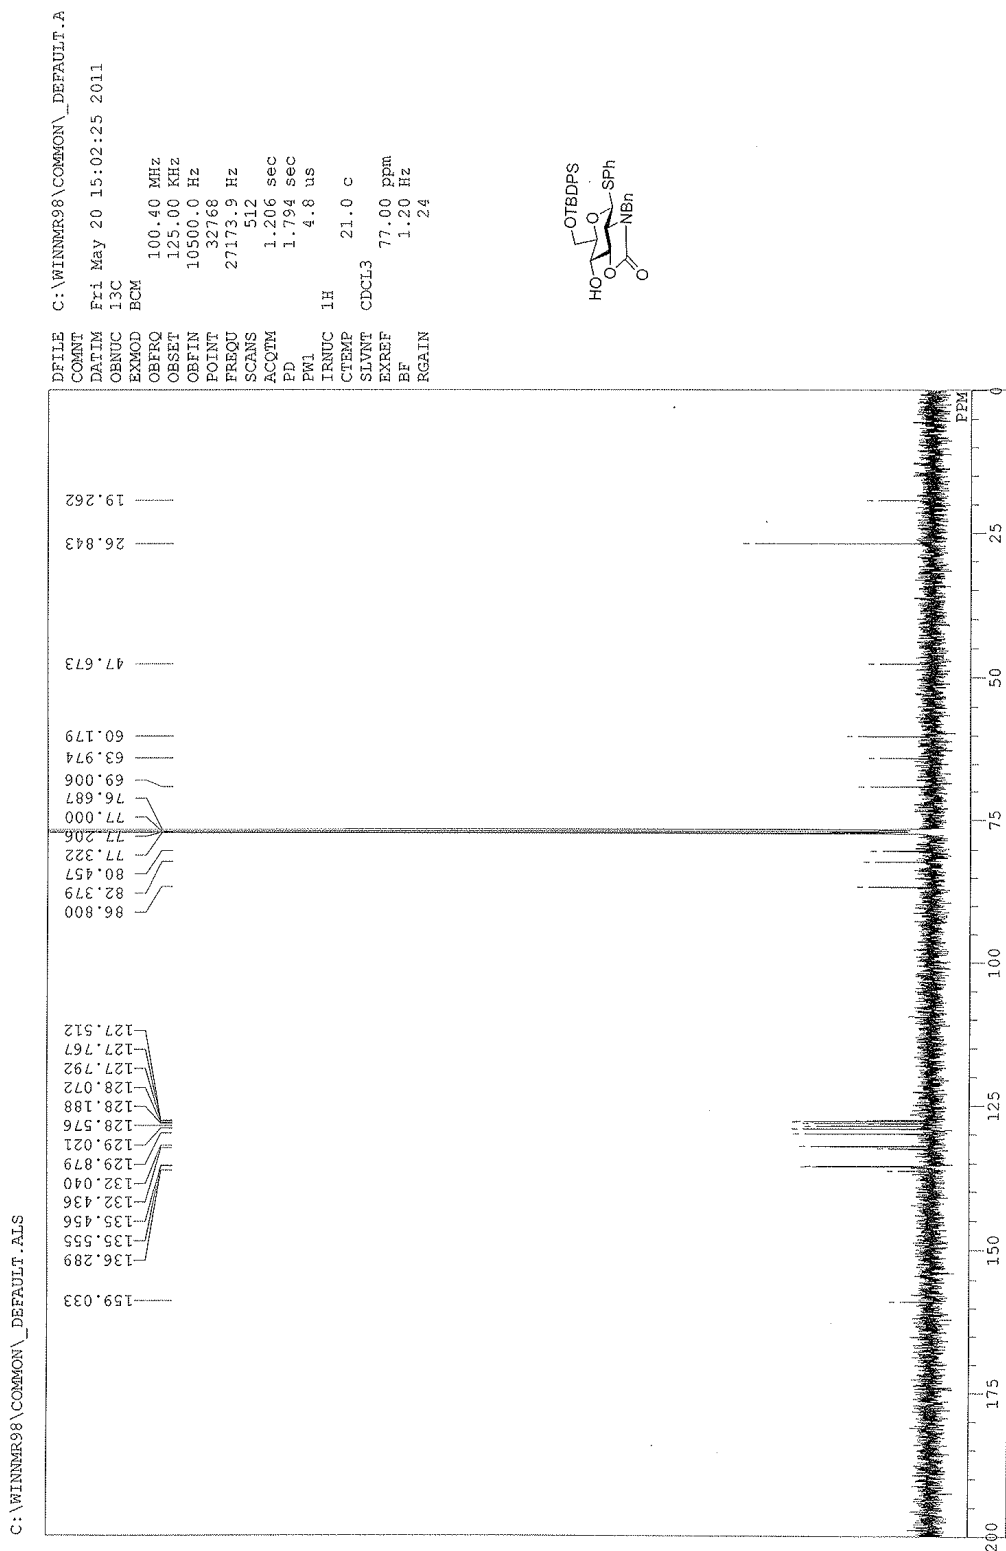

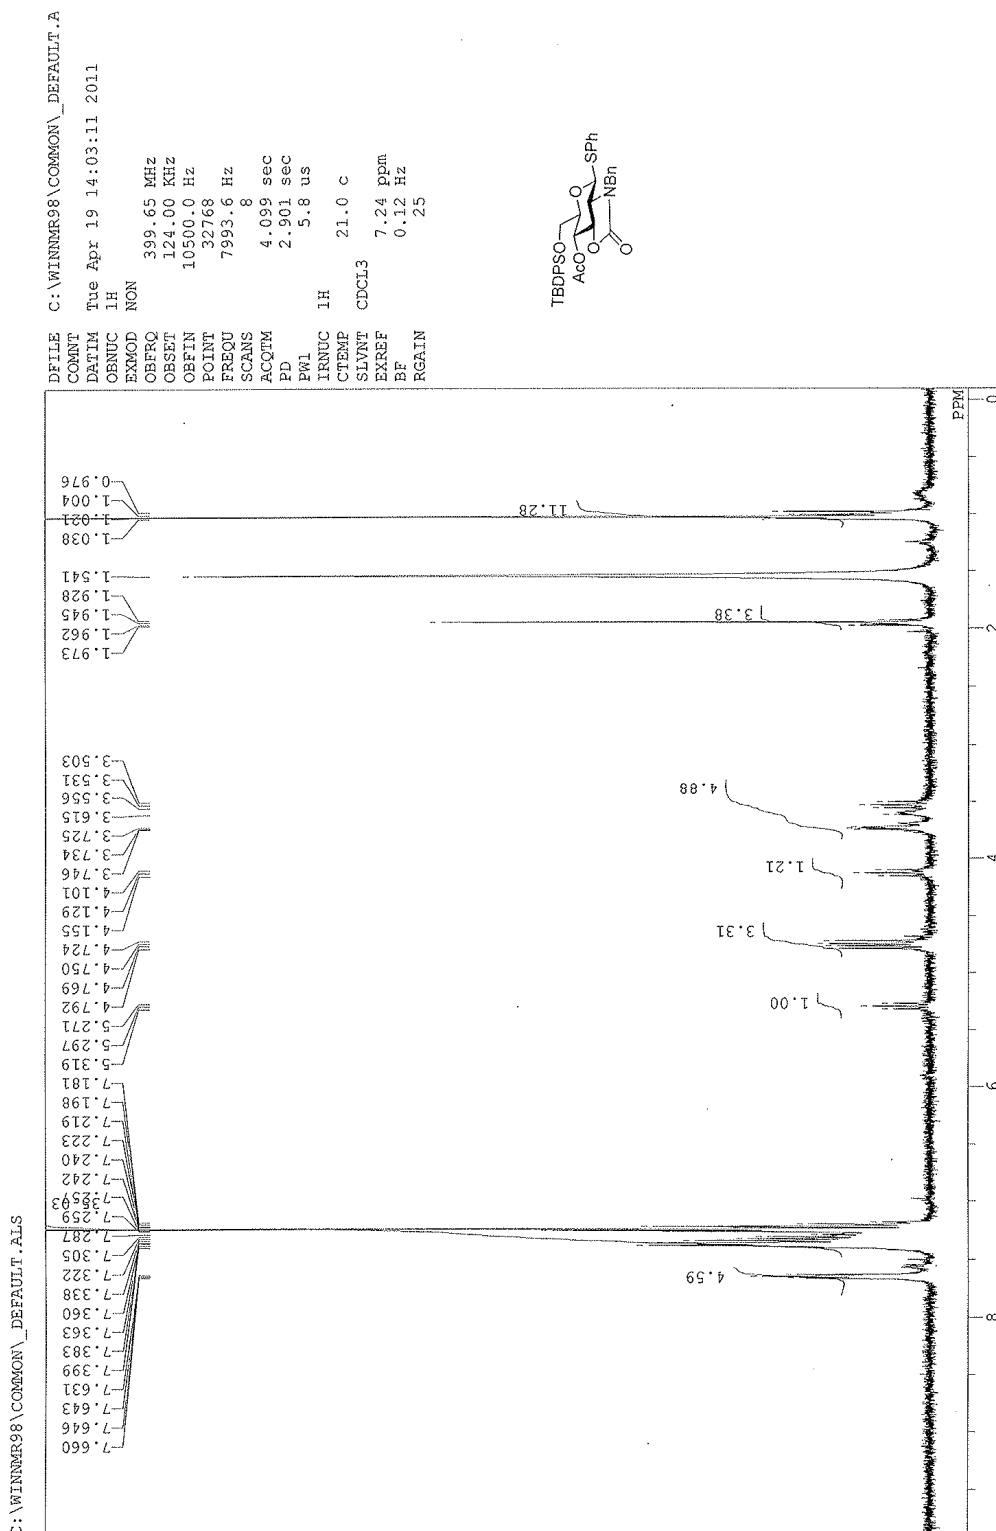

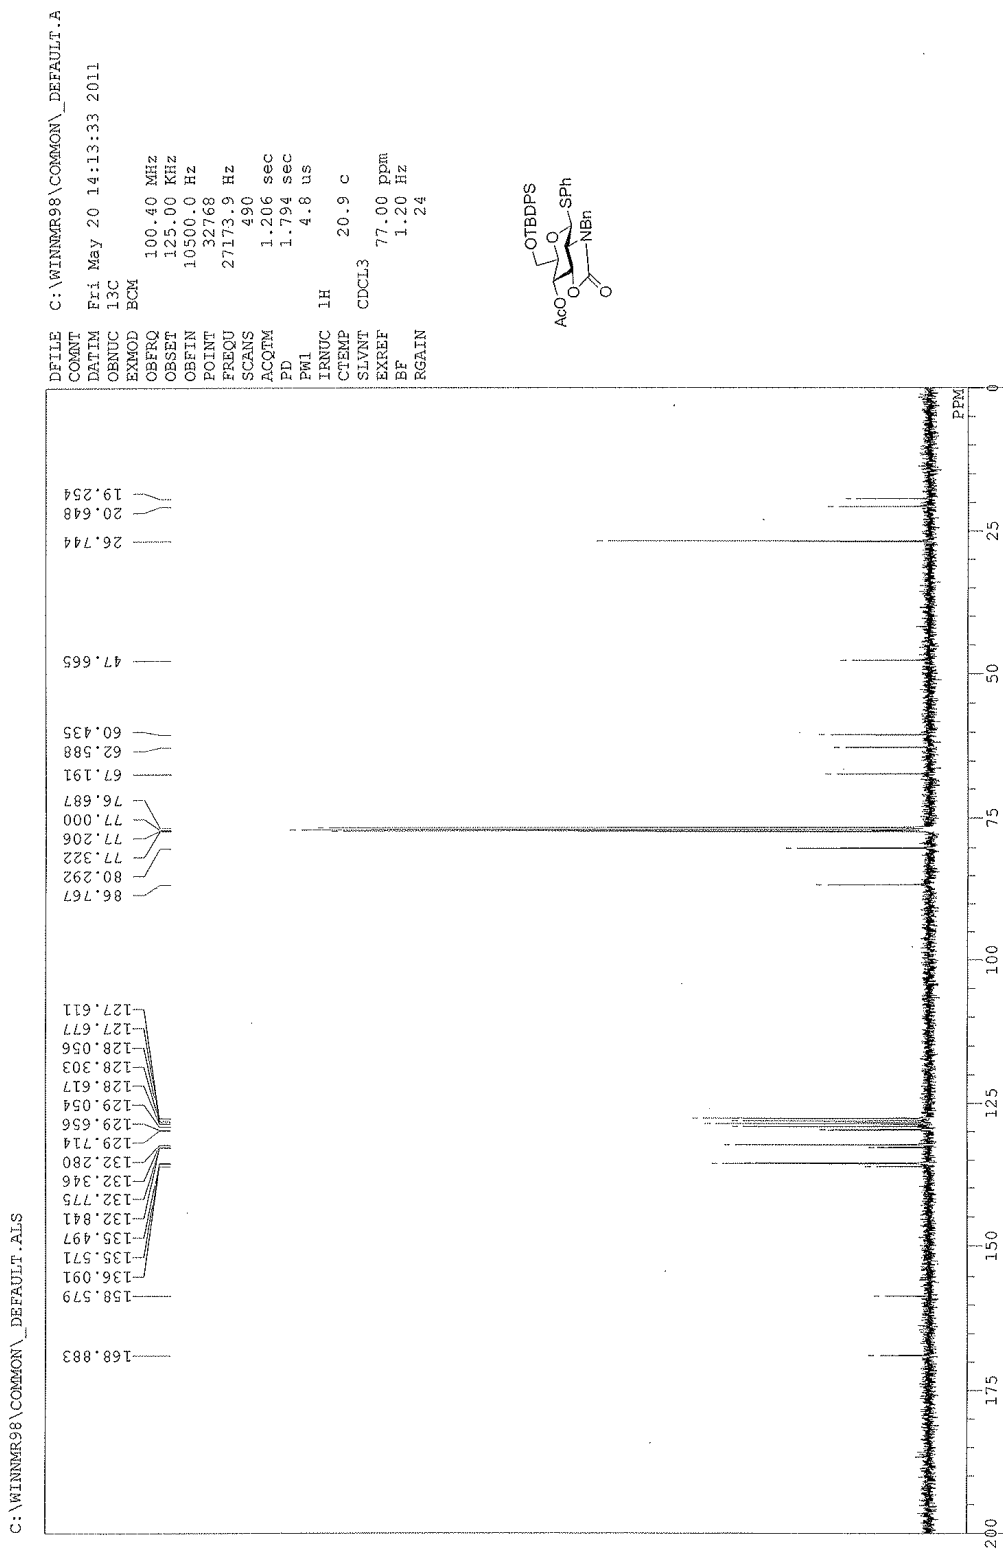

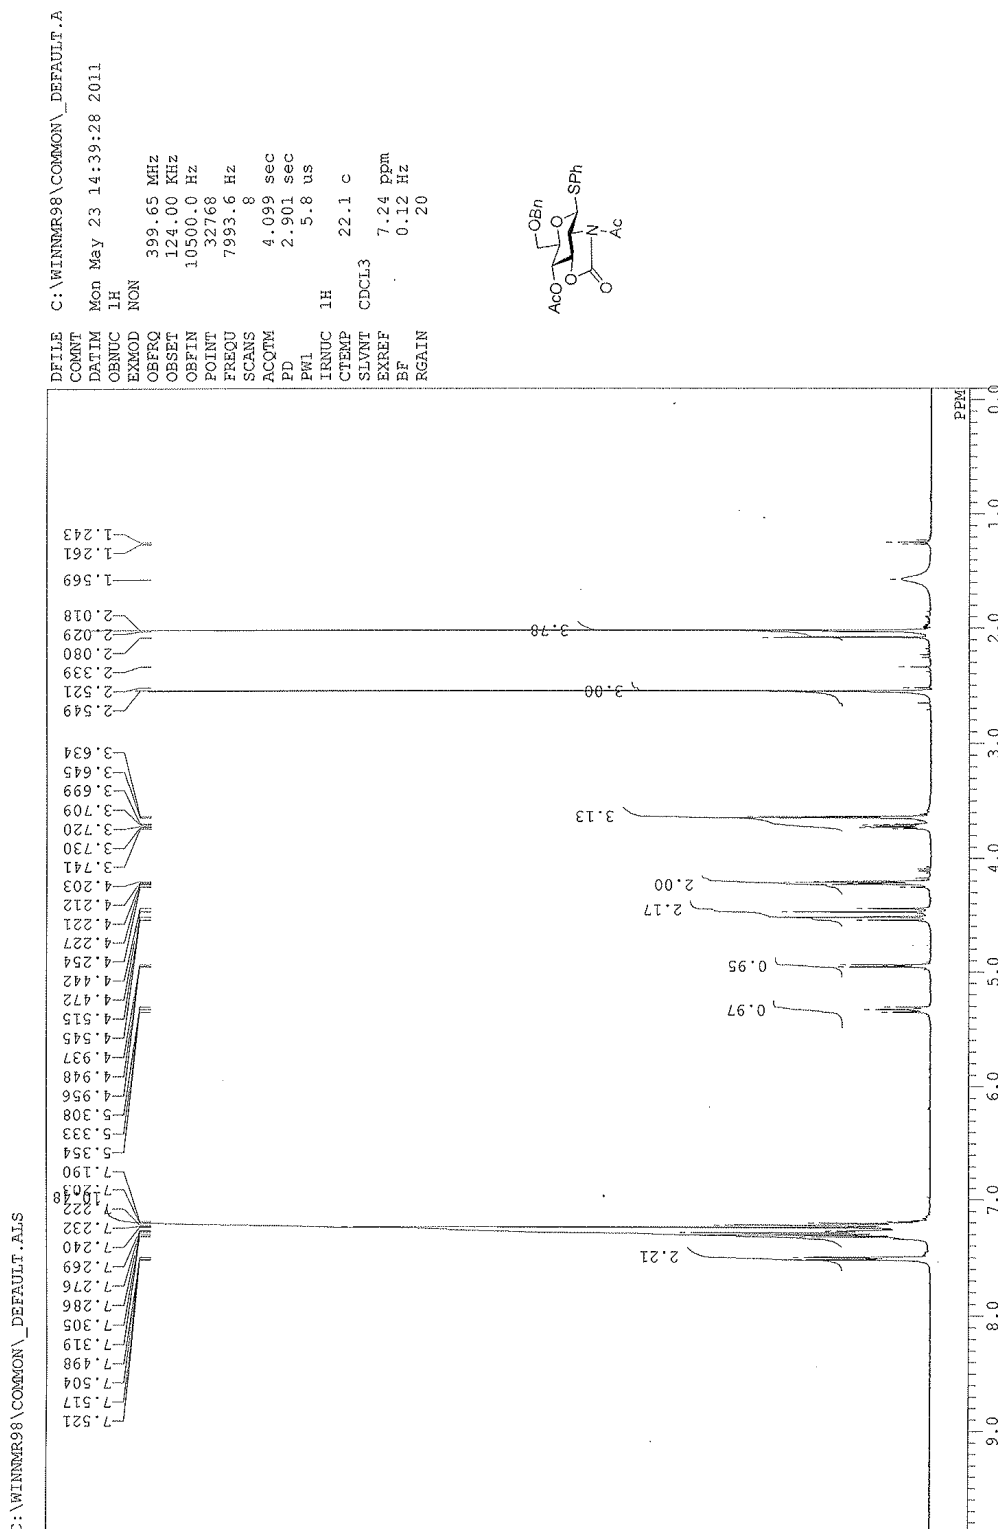



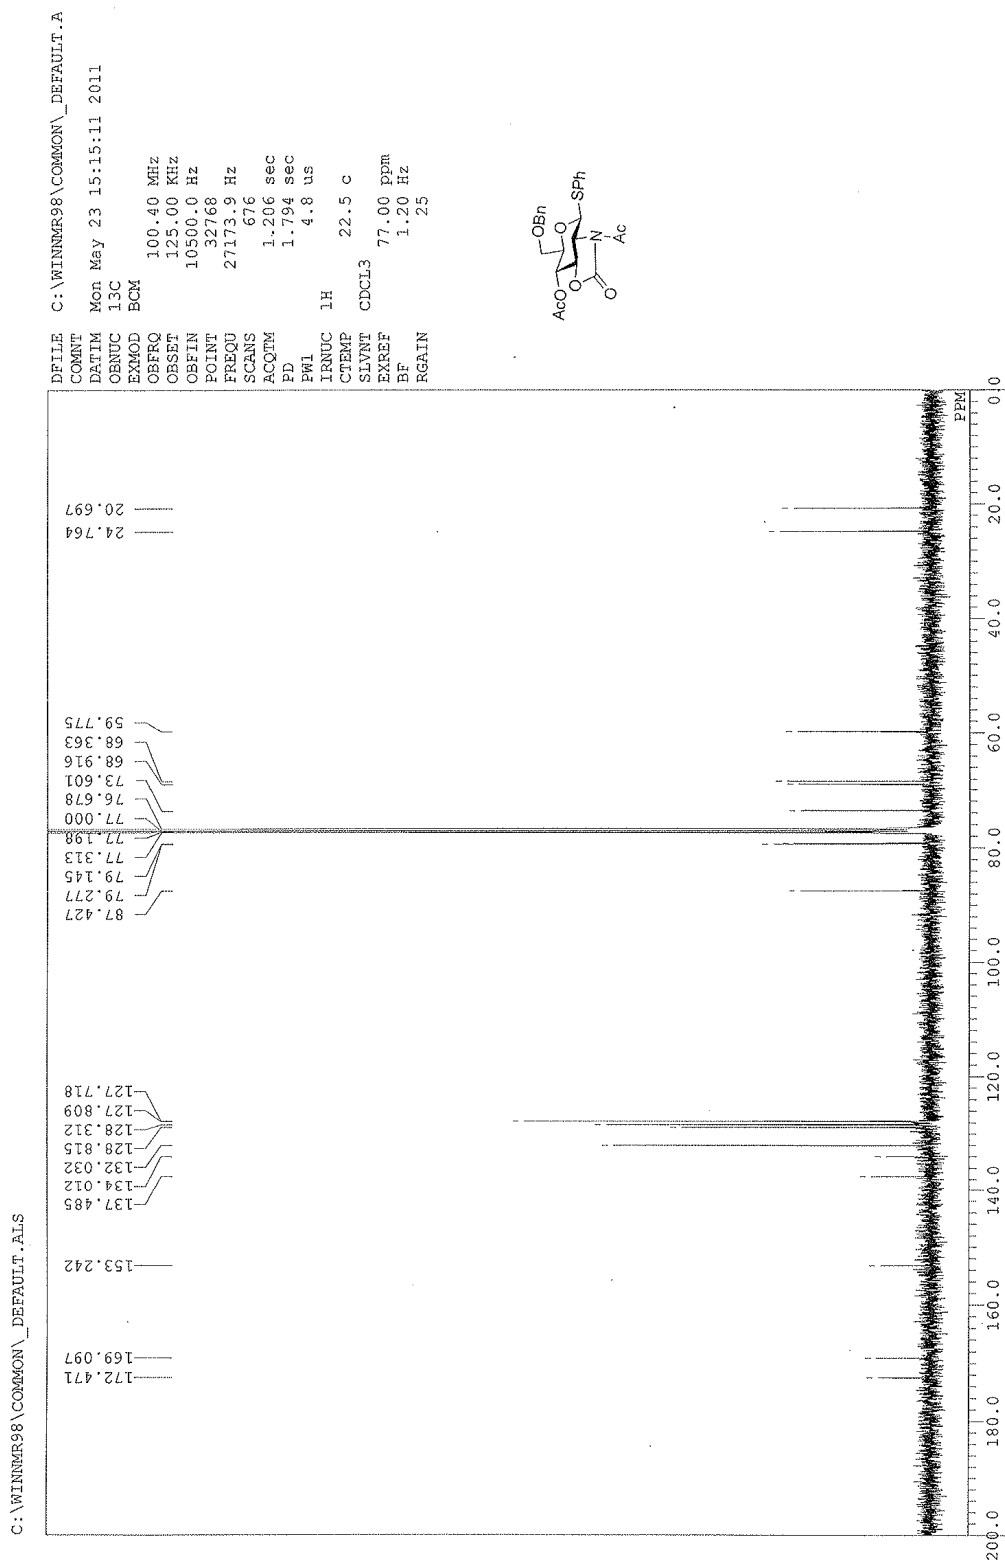

C:\WINNR98\COMMON\\_DEFAULT.ALS

C:\WINNR98\COMMON\\_DEFAULT.A  
 DEFILE  
 COMNT  
 DATIM Fri Apr 01 23:20:47 2011  
 GENUC 1H  
 EXMOD NON  
 OBFREQ 399.65 MHz  
 OBSET 124.00 KHz  
 OBEIN 10500.0 Hz  
 POINT 32768  
 FREQU 7993.6 Hz  
 SCANS 8  
 ACQTM 4.099 sec  
 PD 2.901 sec  
 FWL 5.8 us  
 IRNUC 1H  
 CTEMP 21.5 c  
 SLVNT CDCL3  
 EXREF 7.24 ppm  
 BF 0.12 Hz  
 RGAIN 22

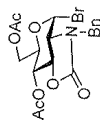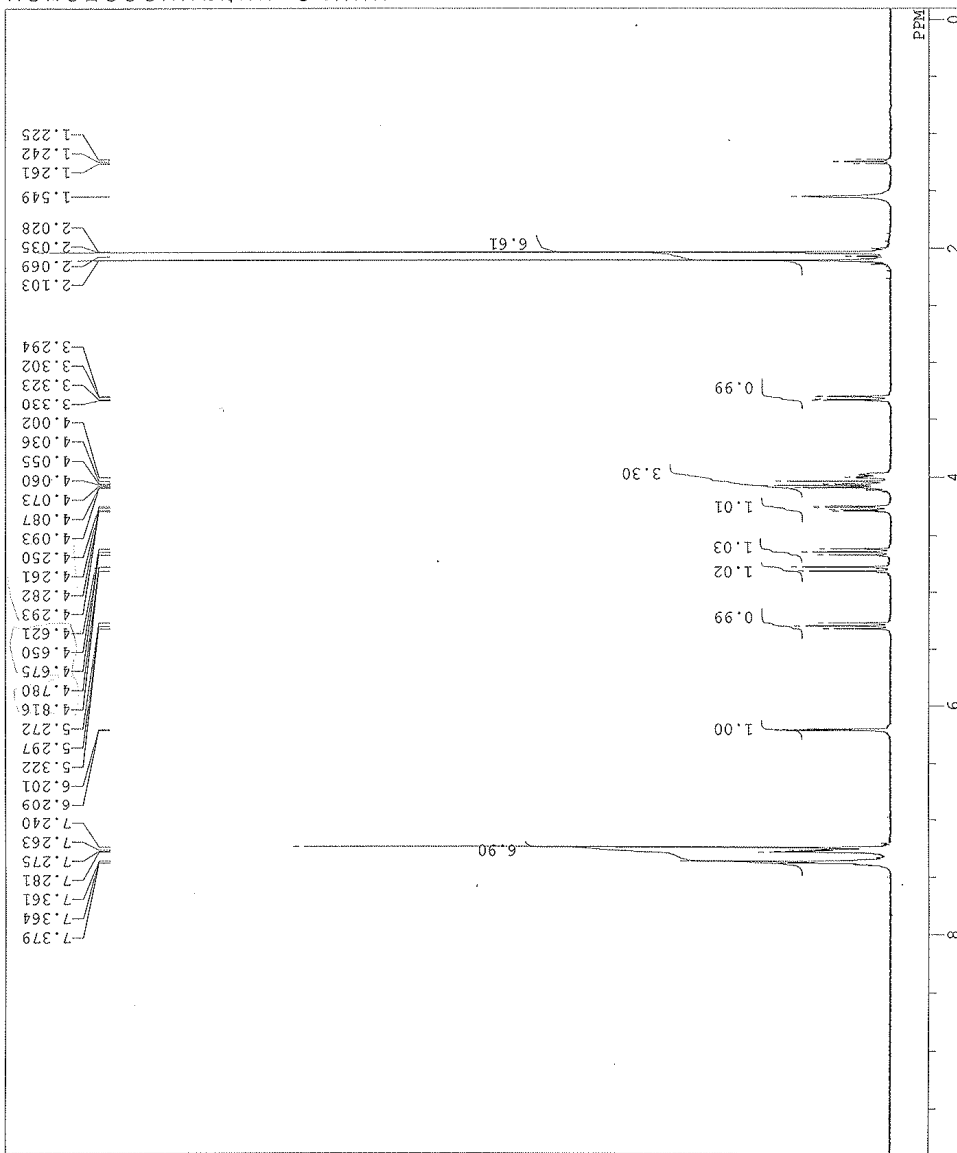

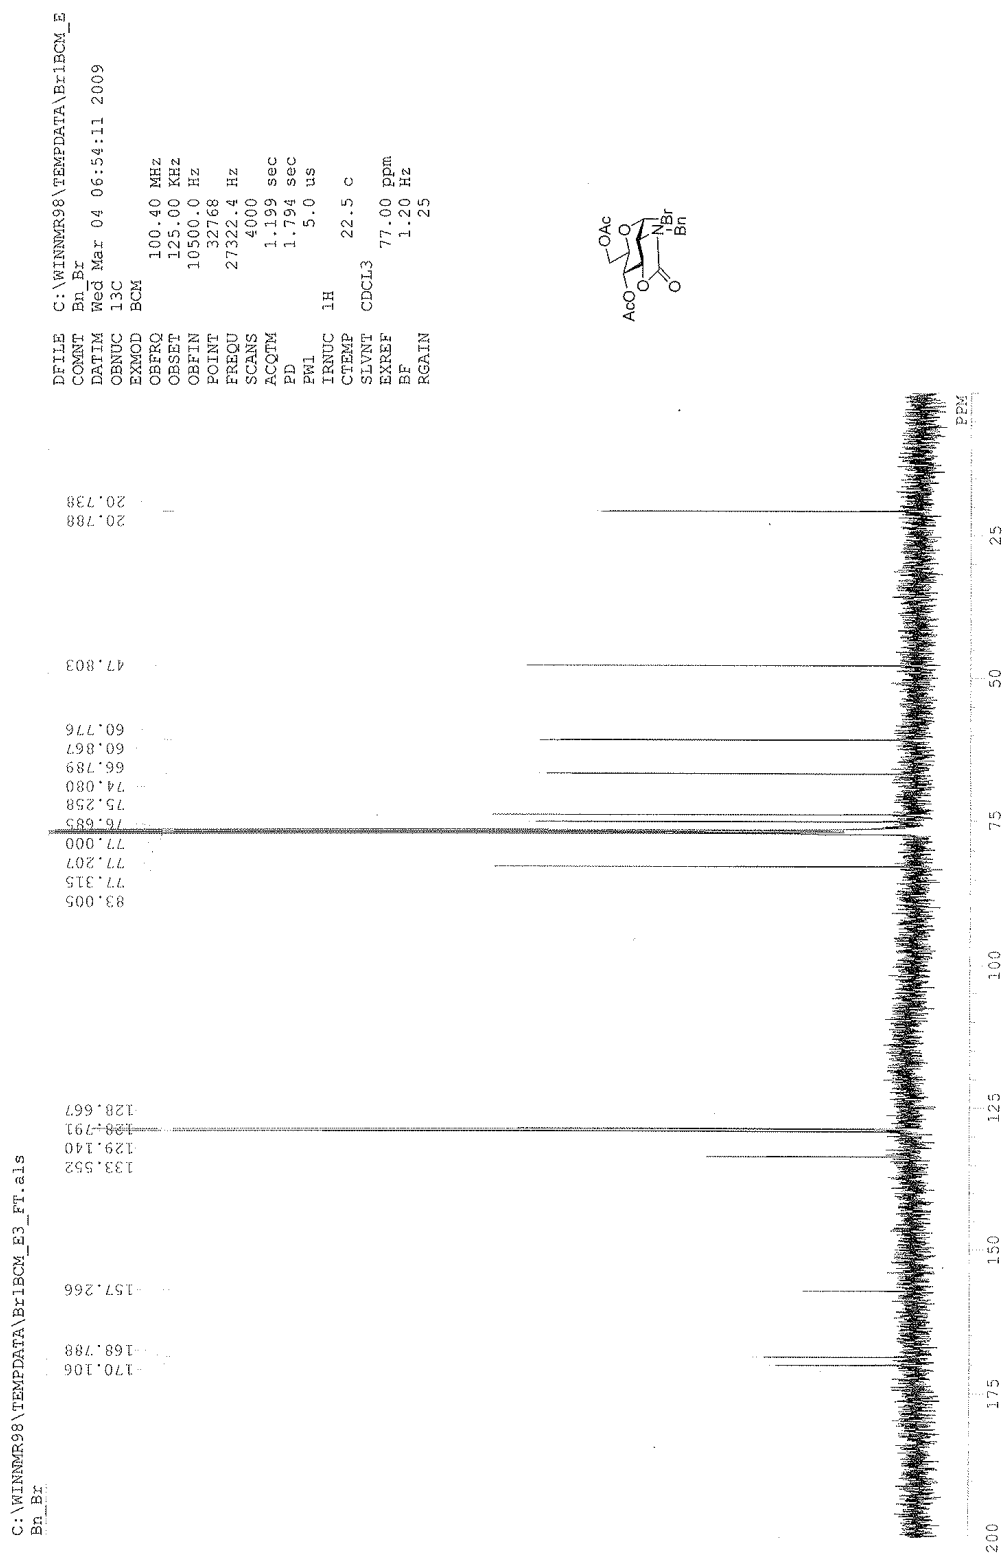

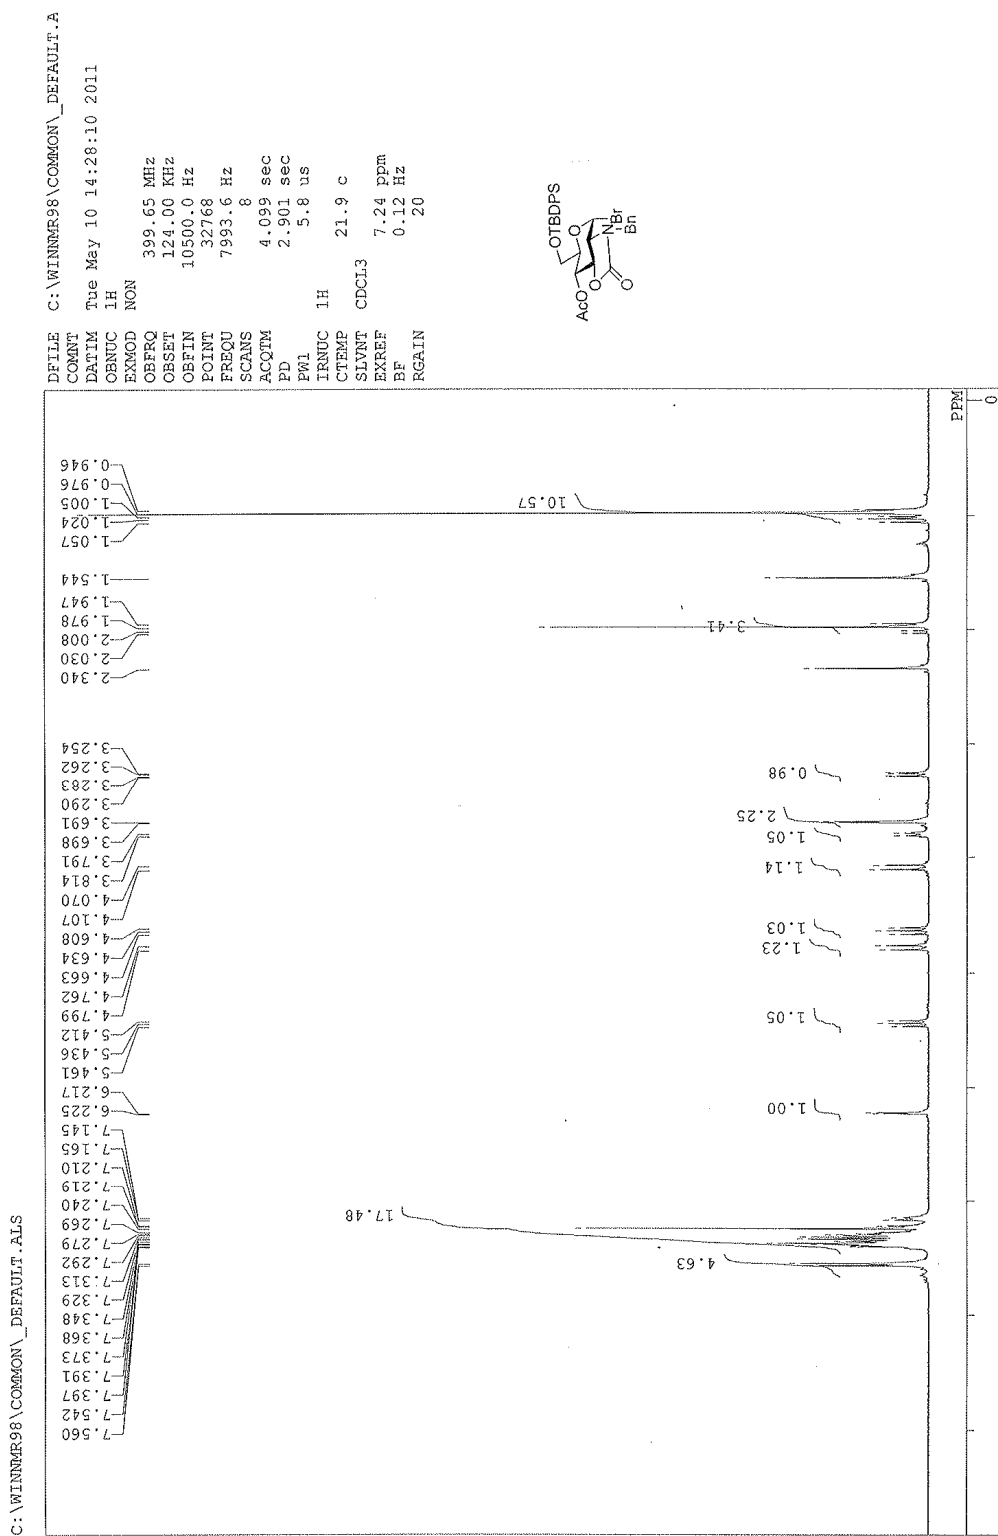

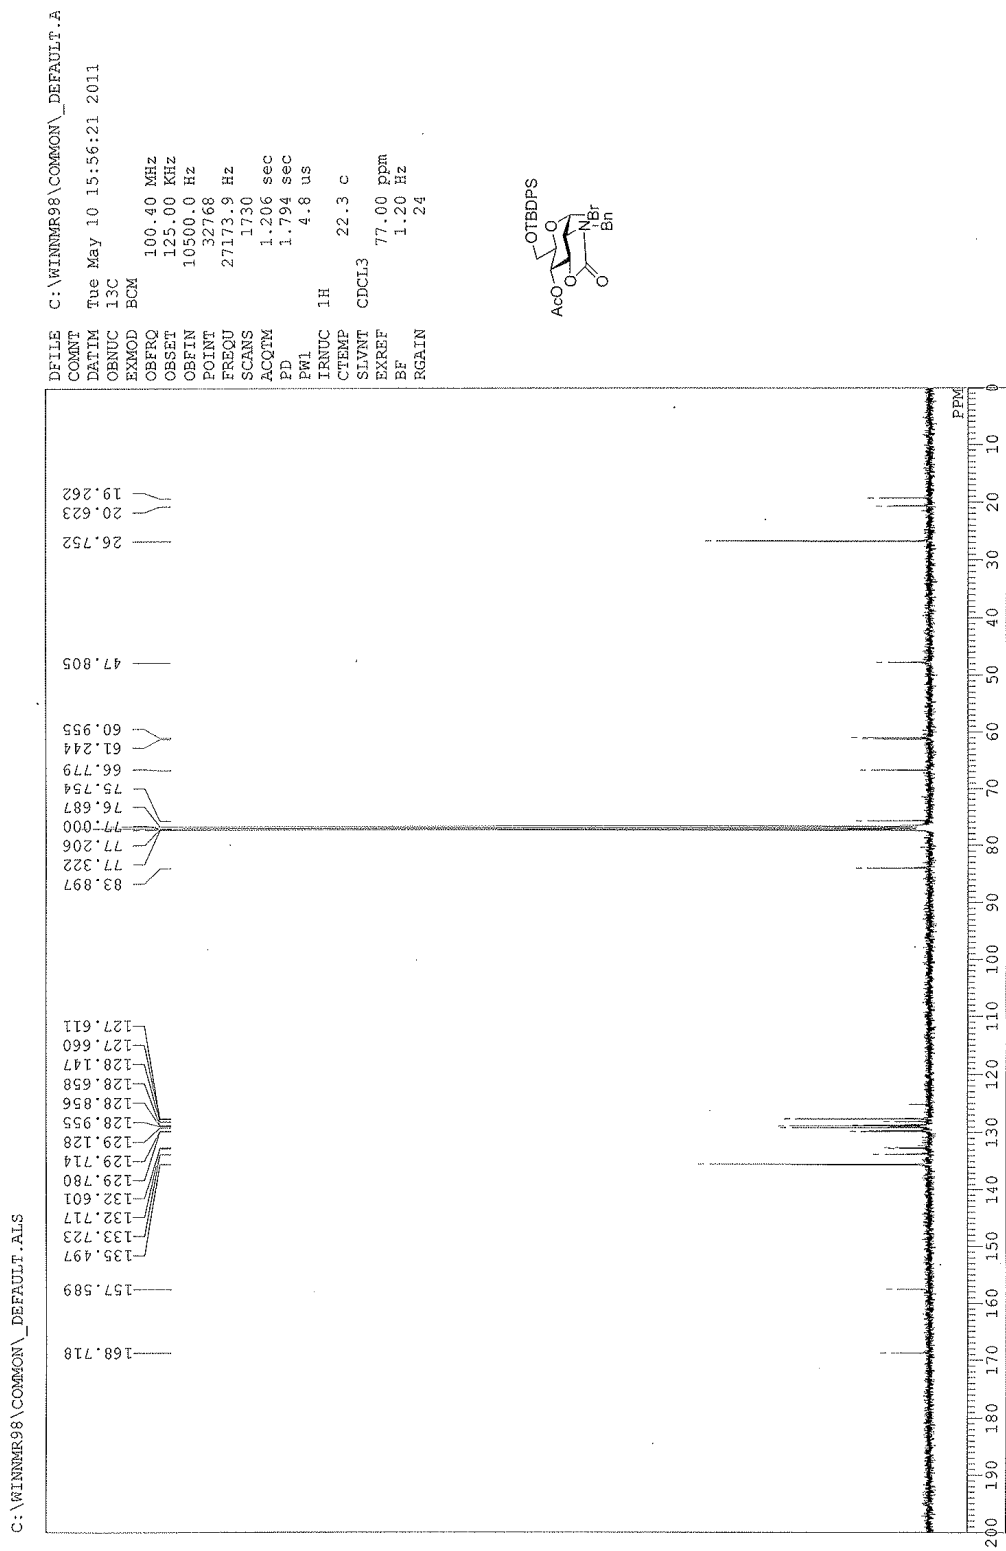

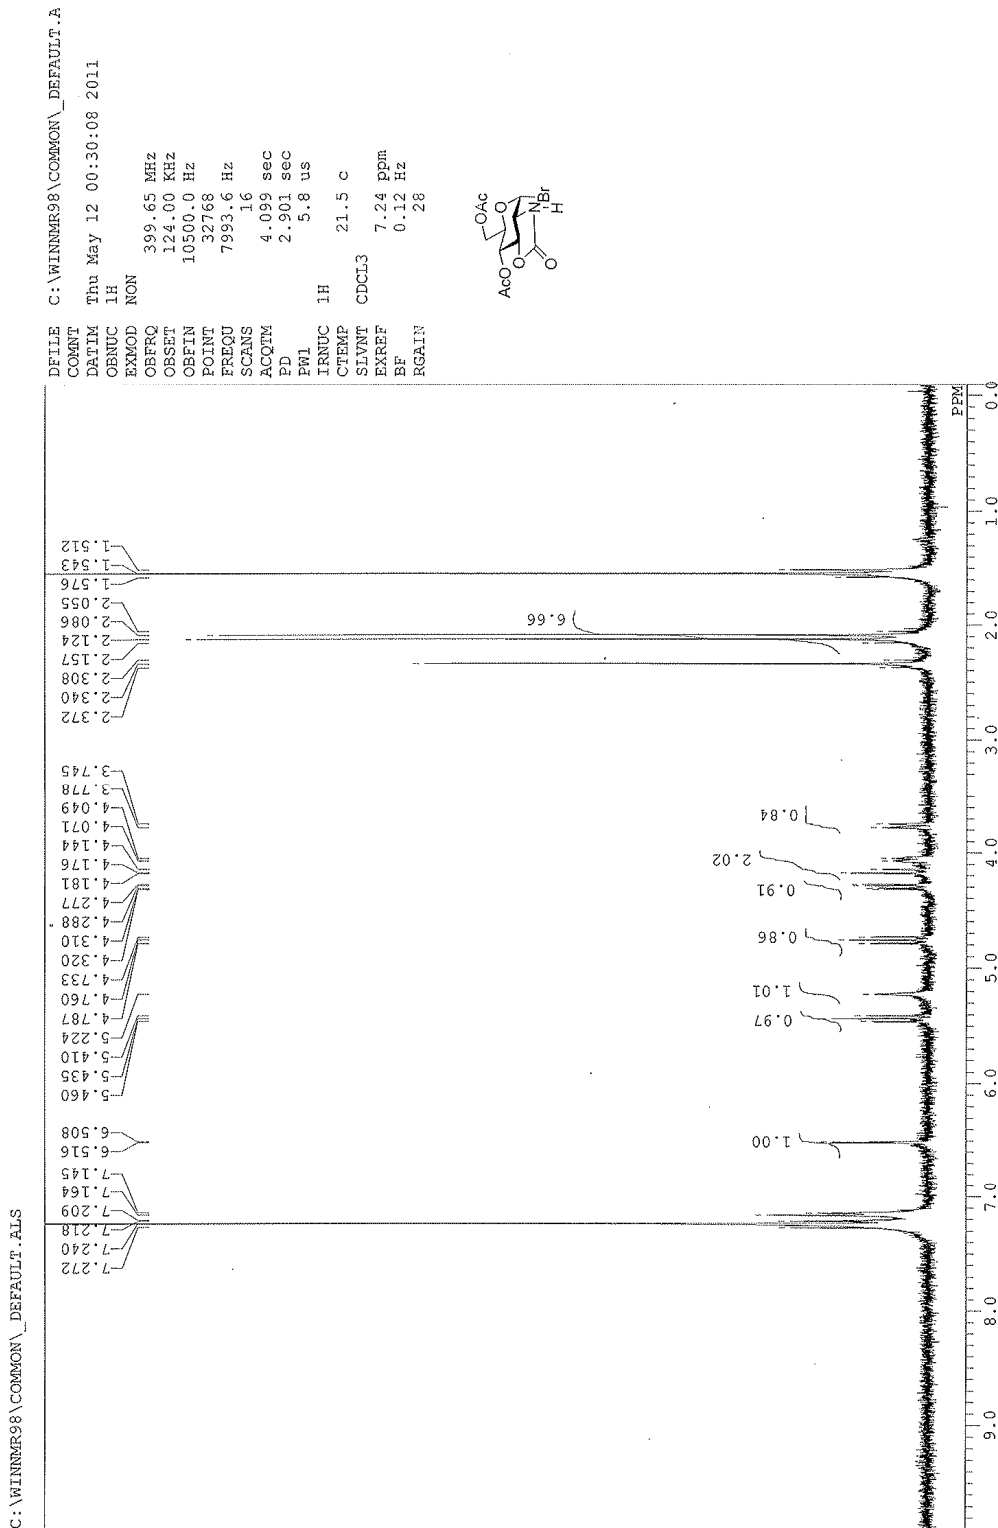

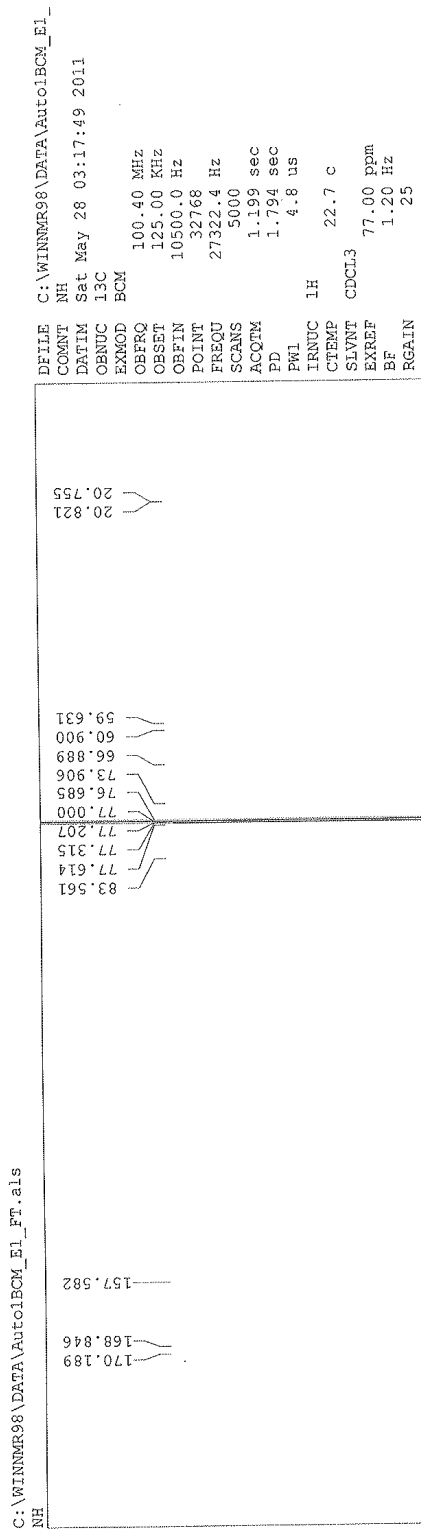

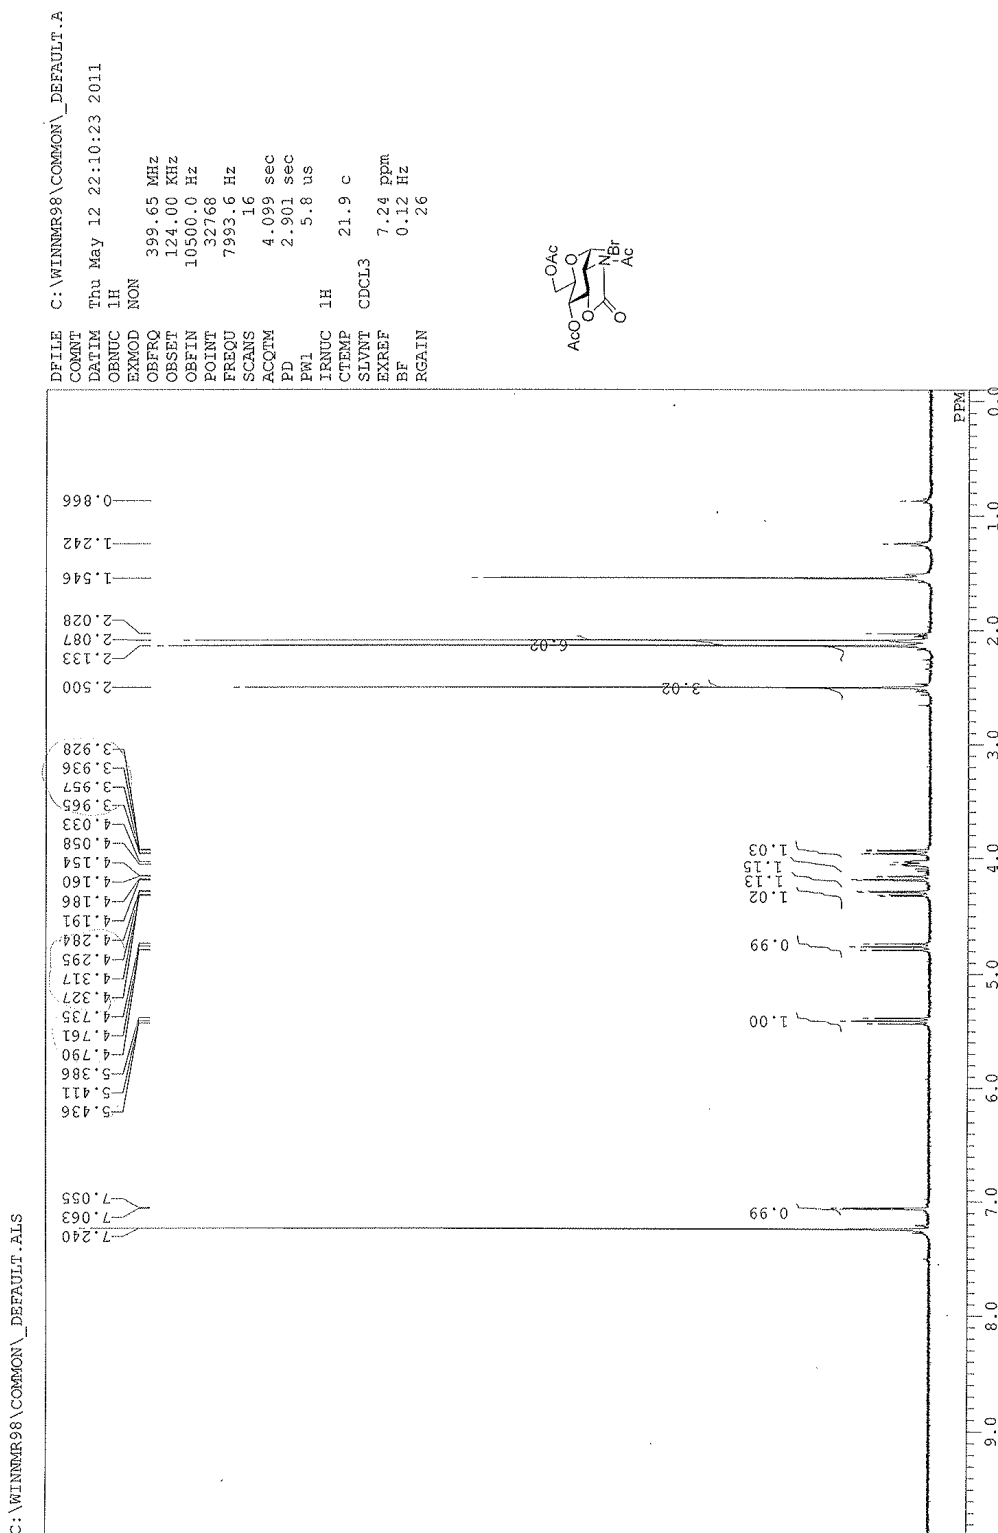



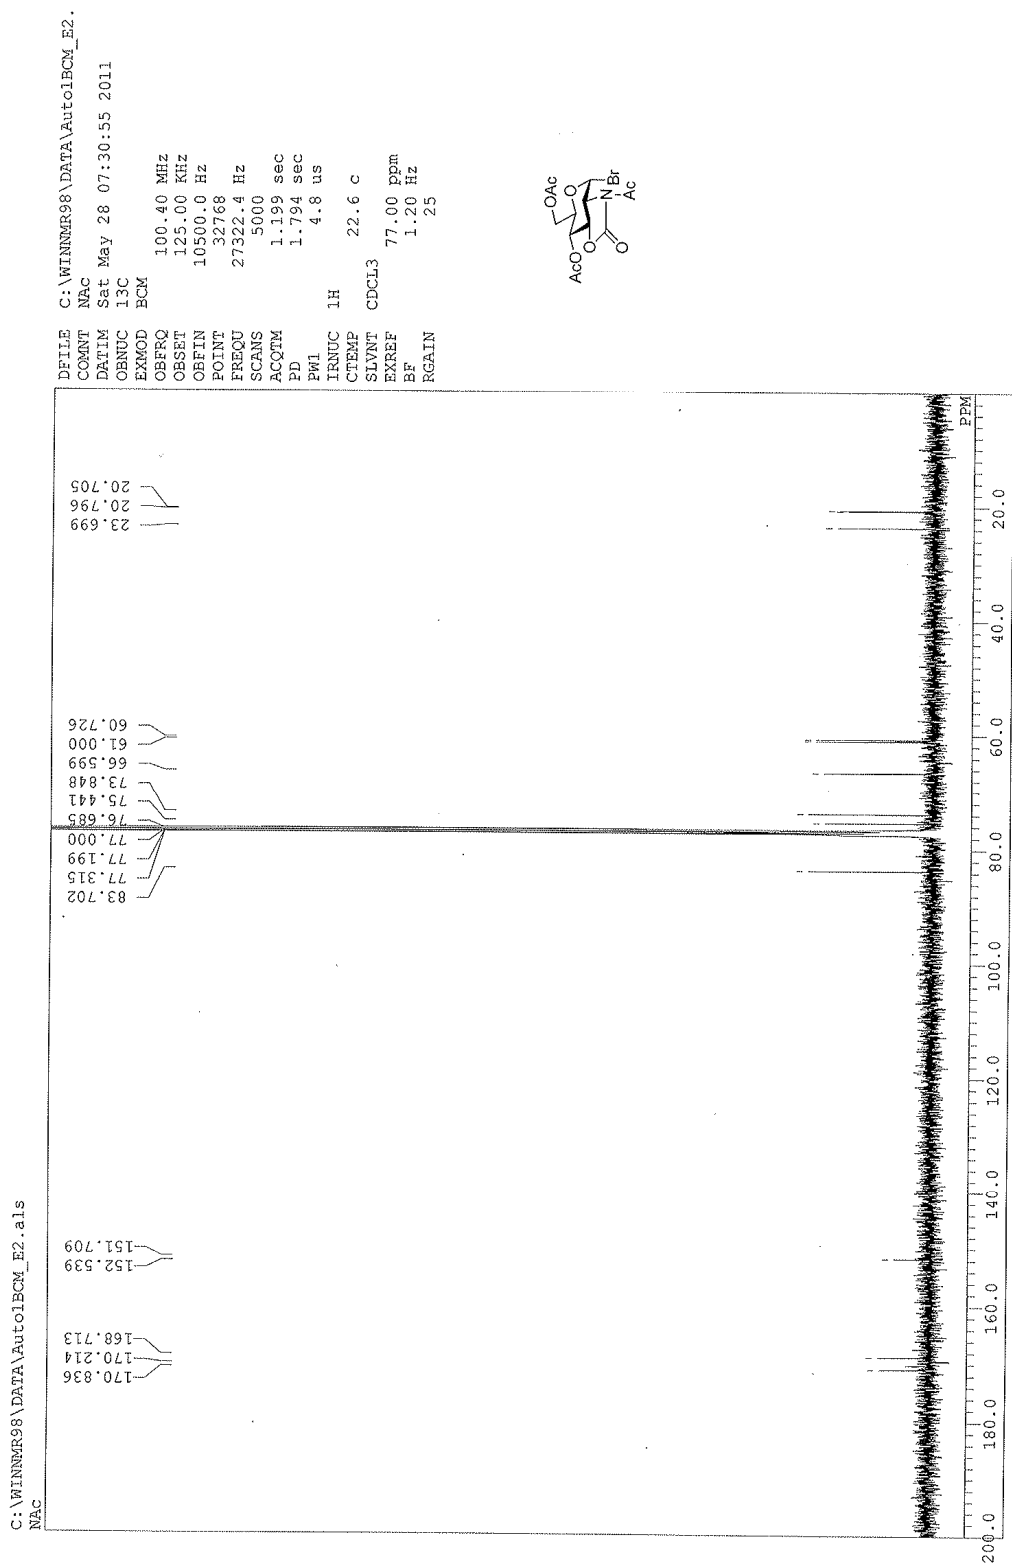

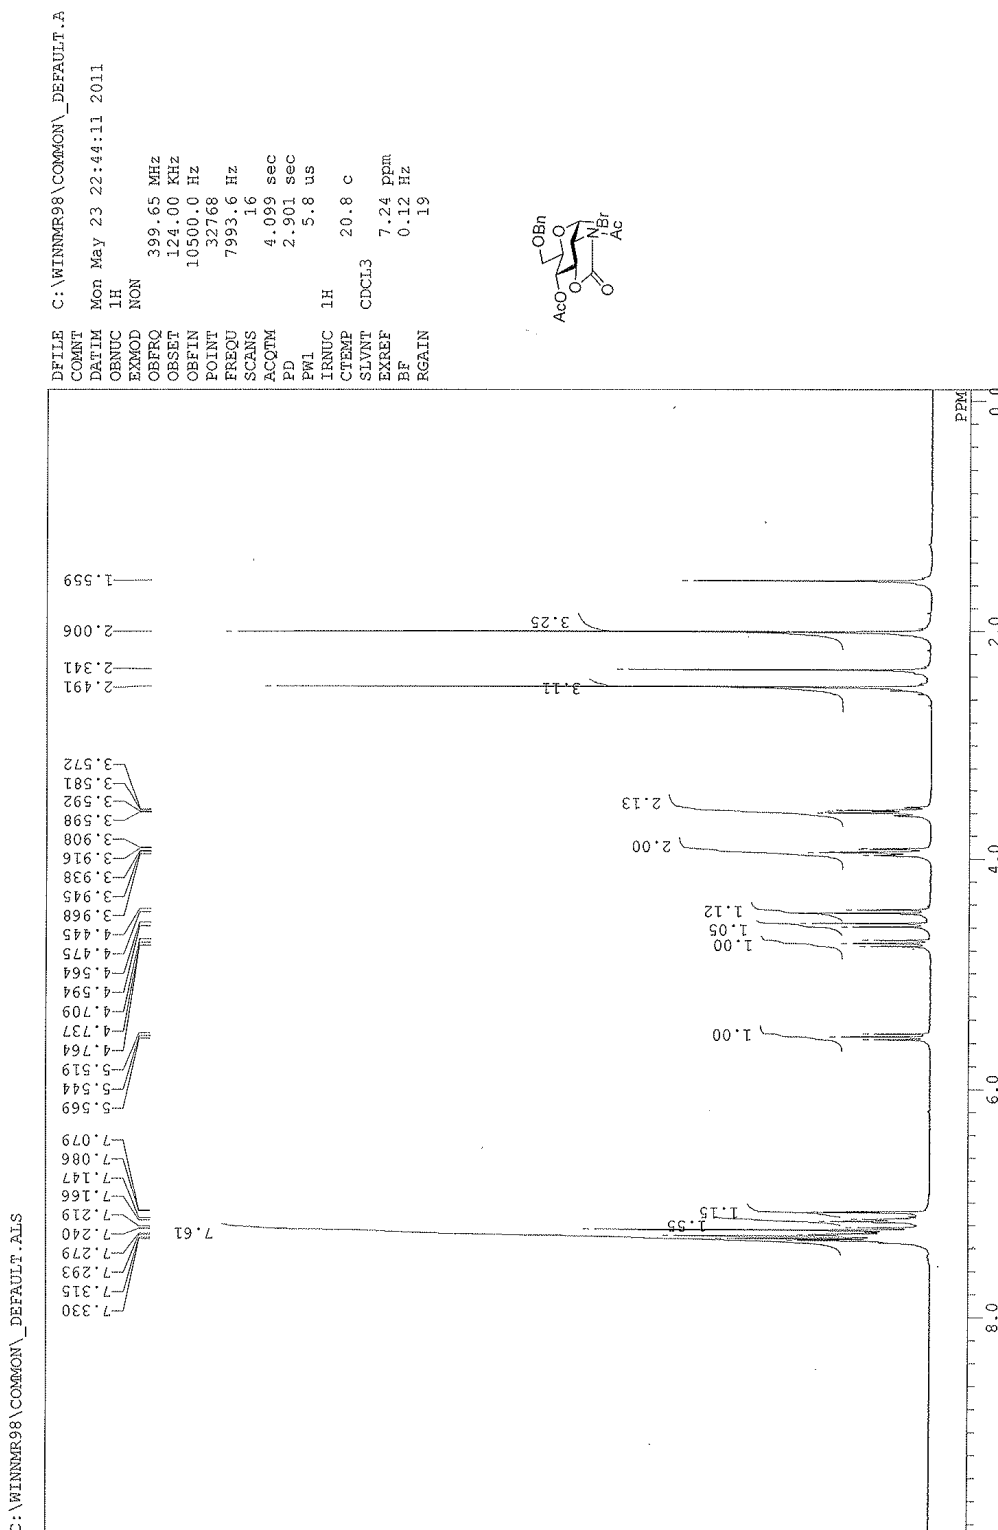

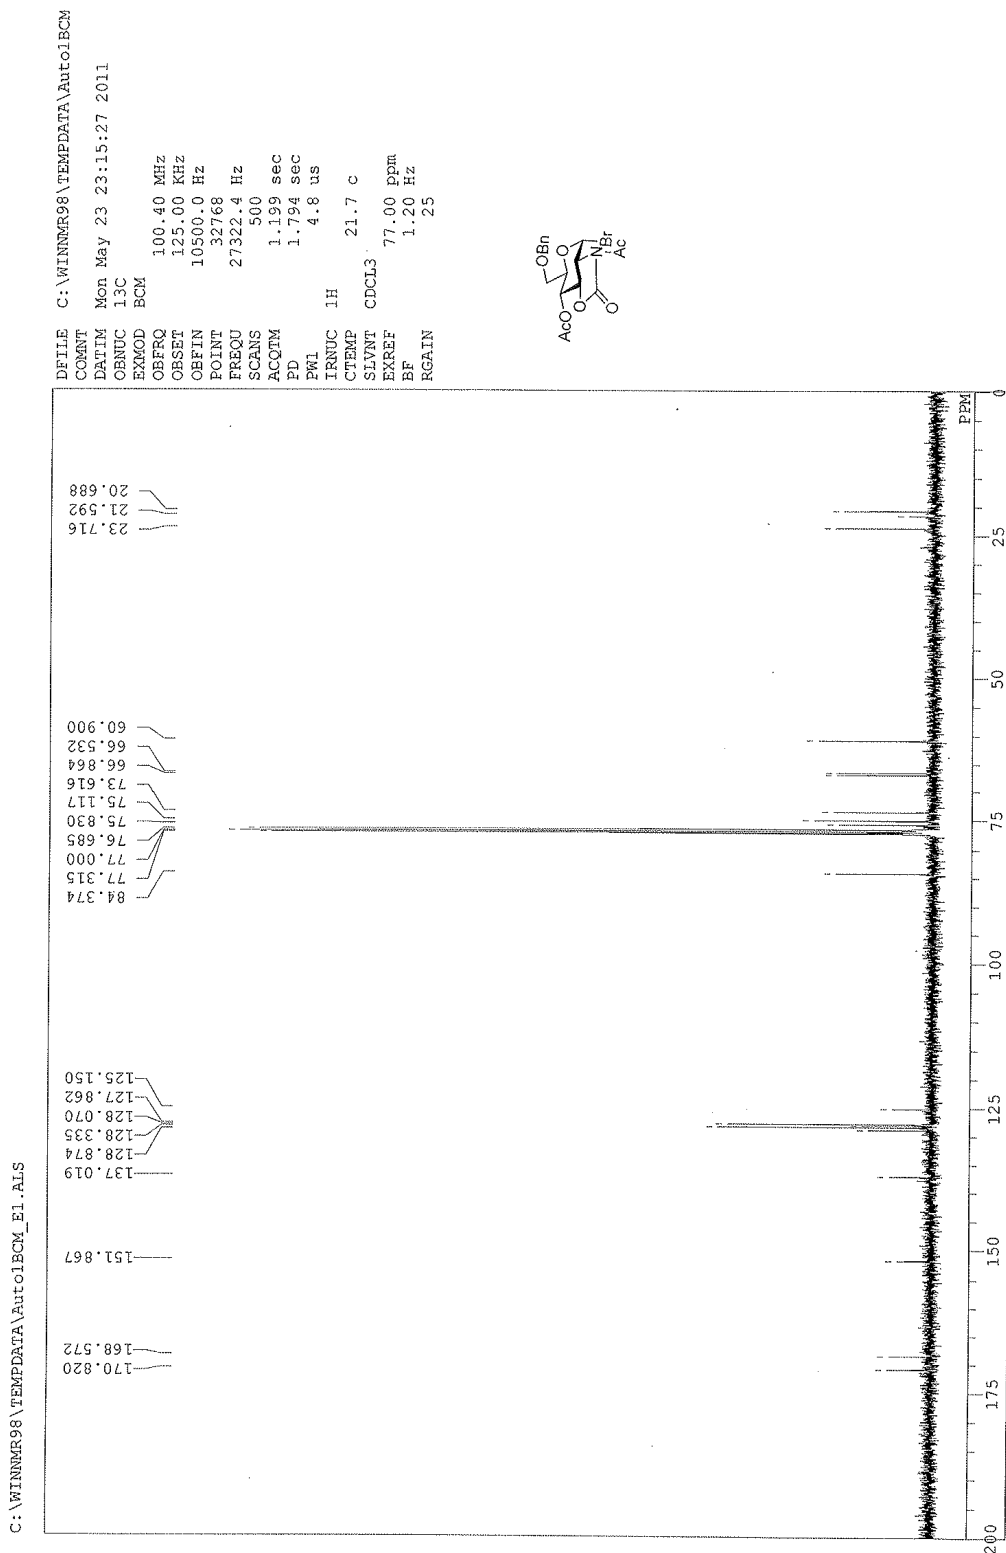

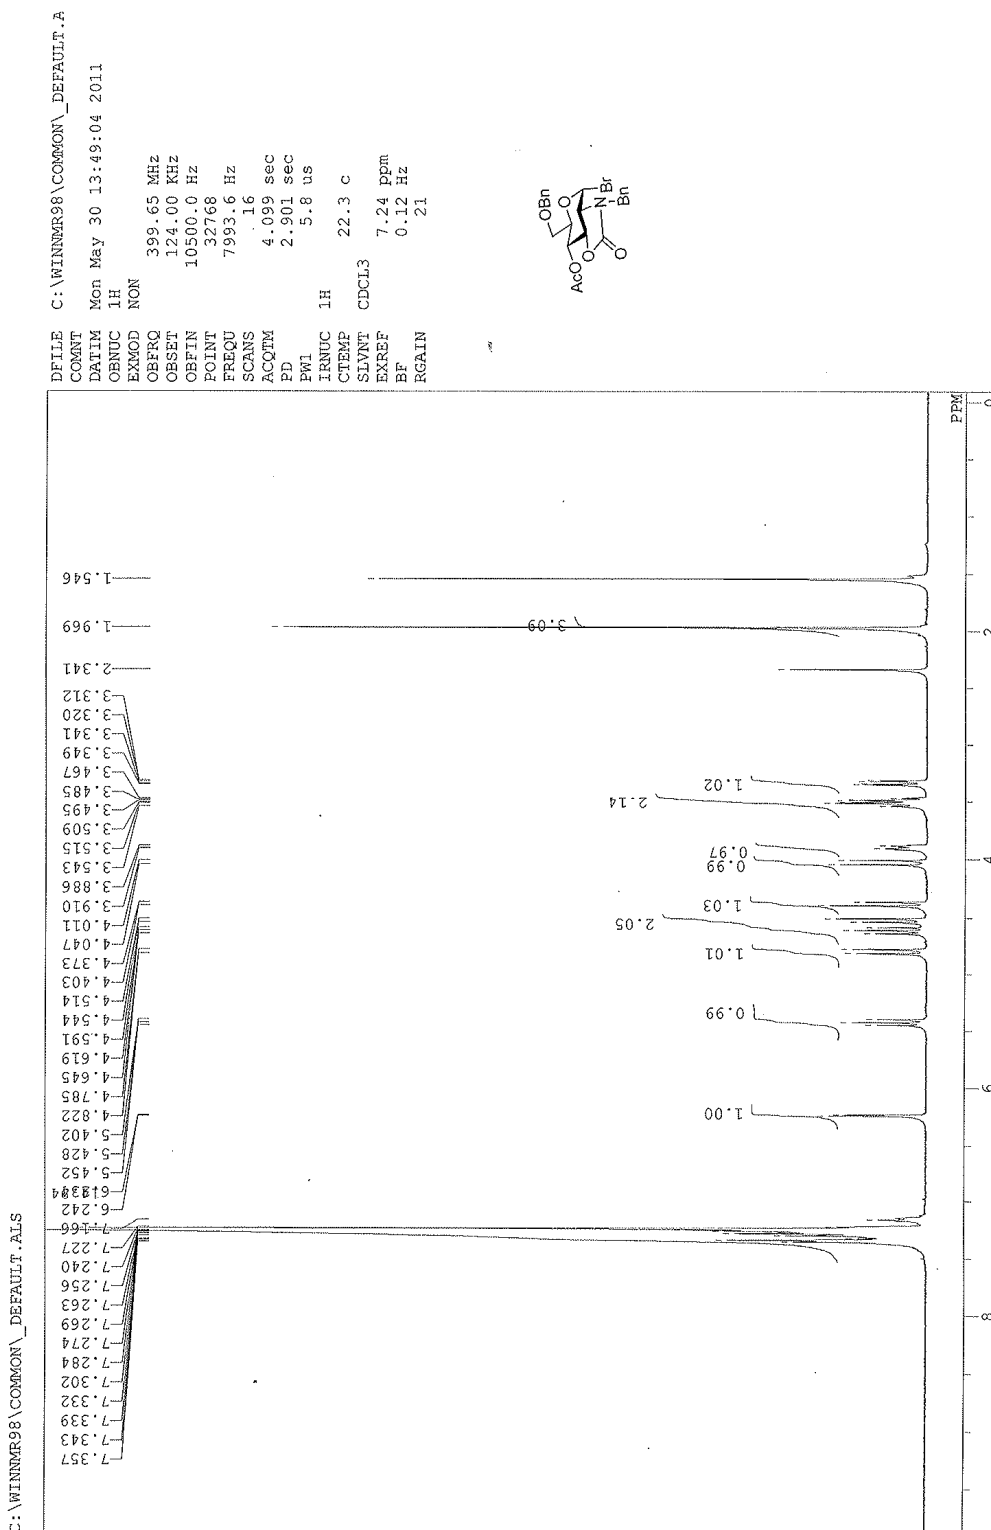

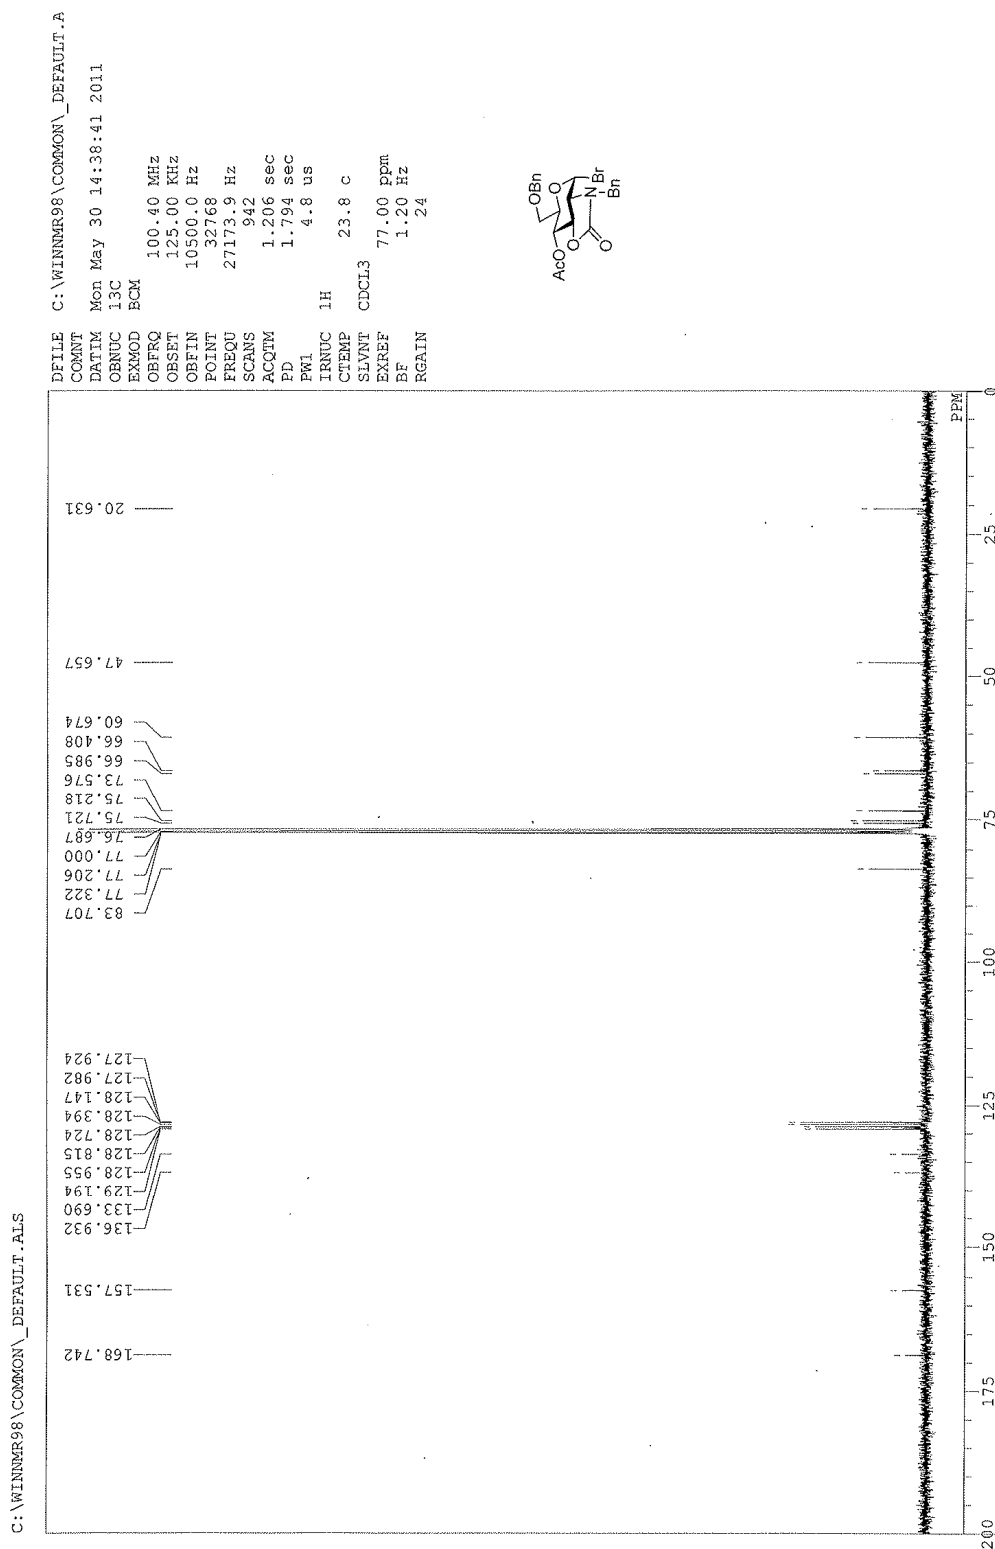



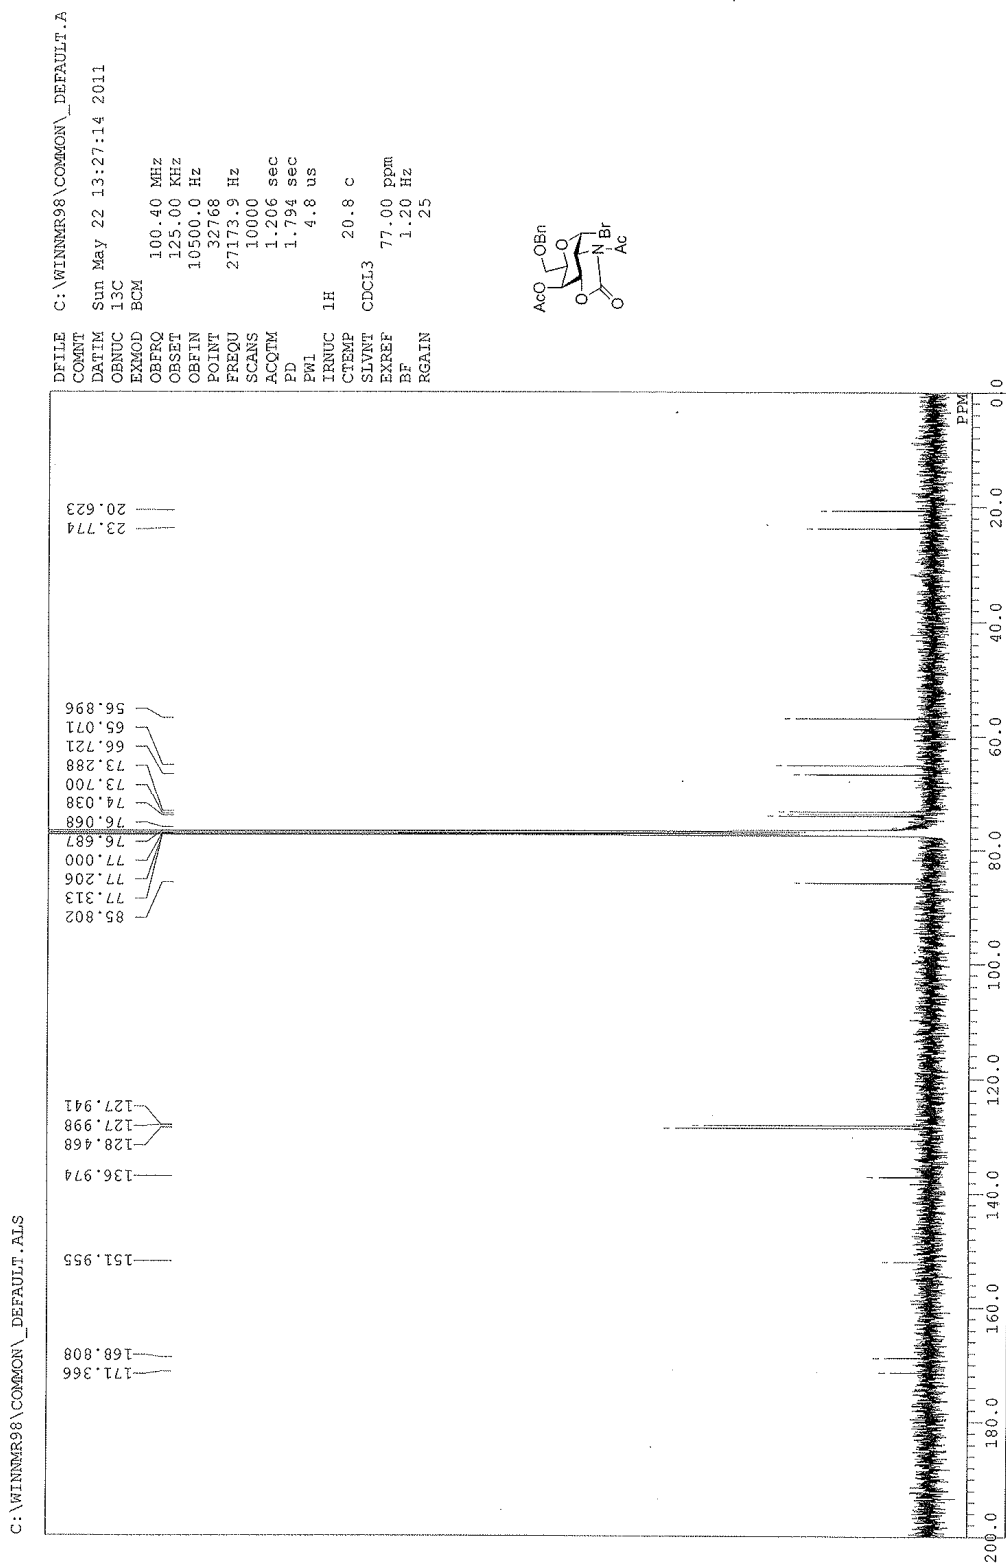

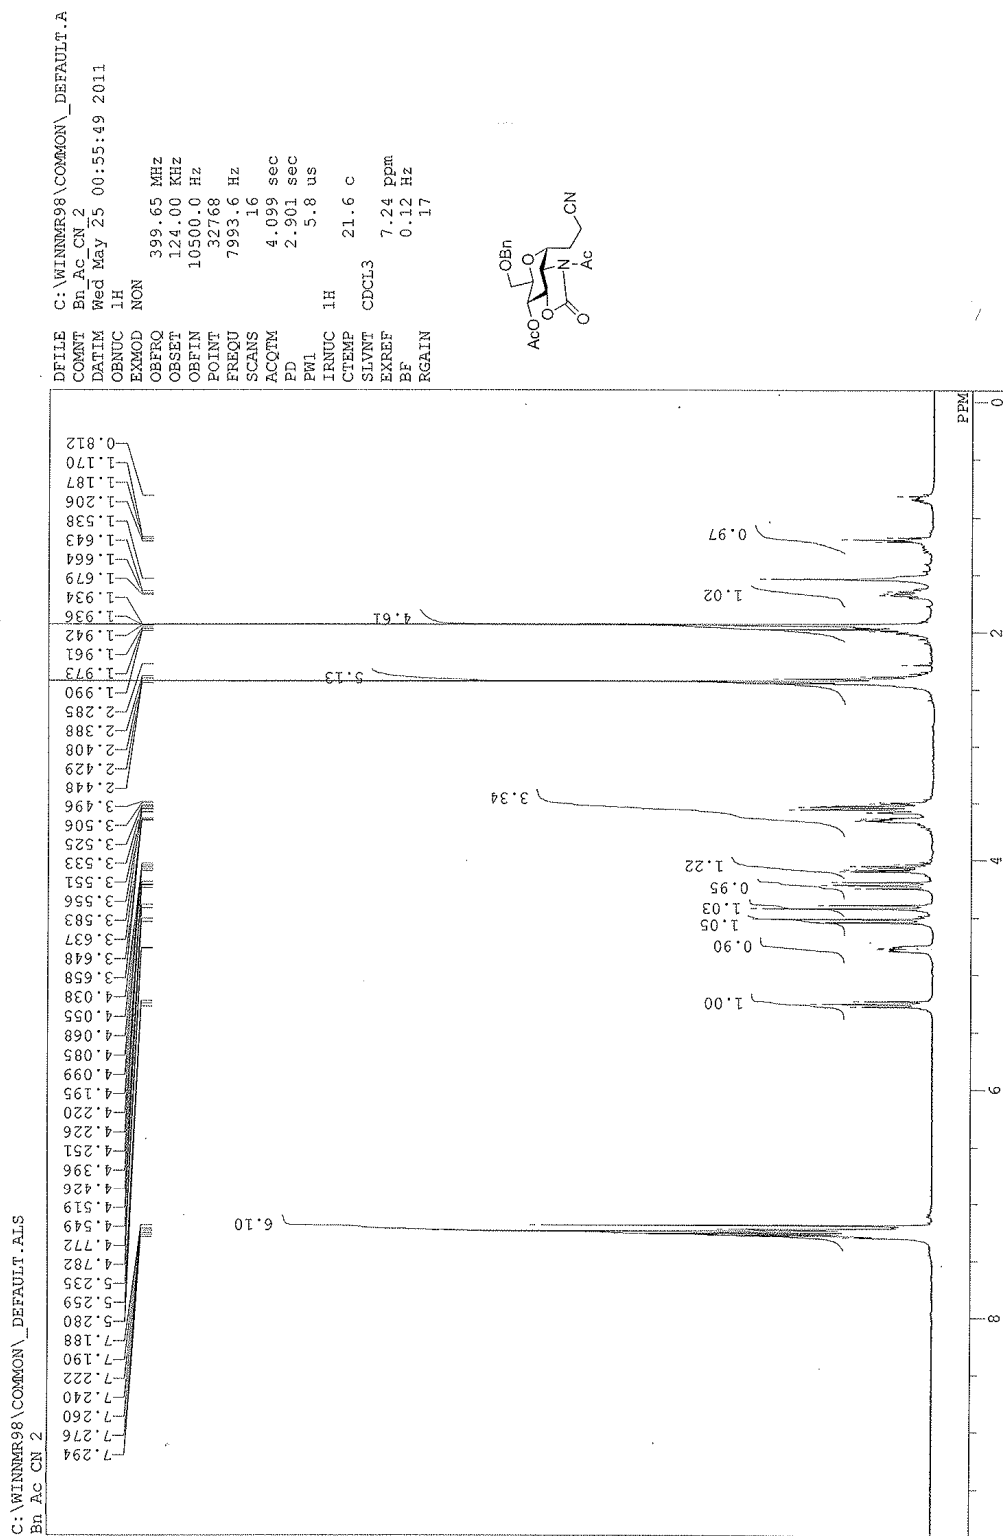



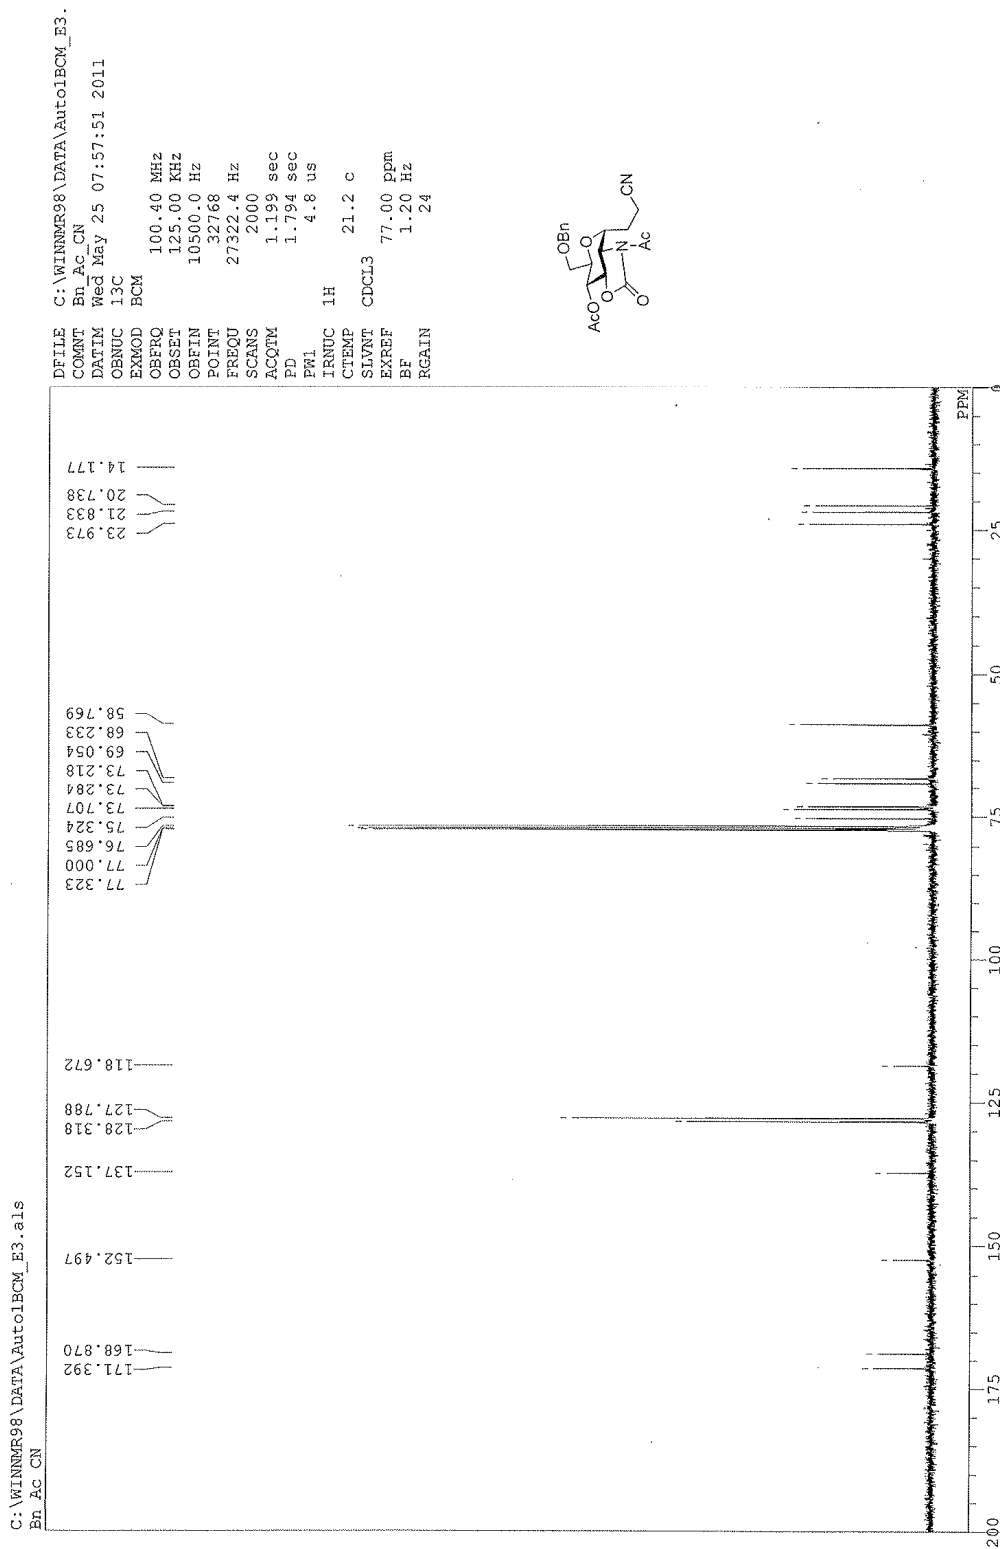

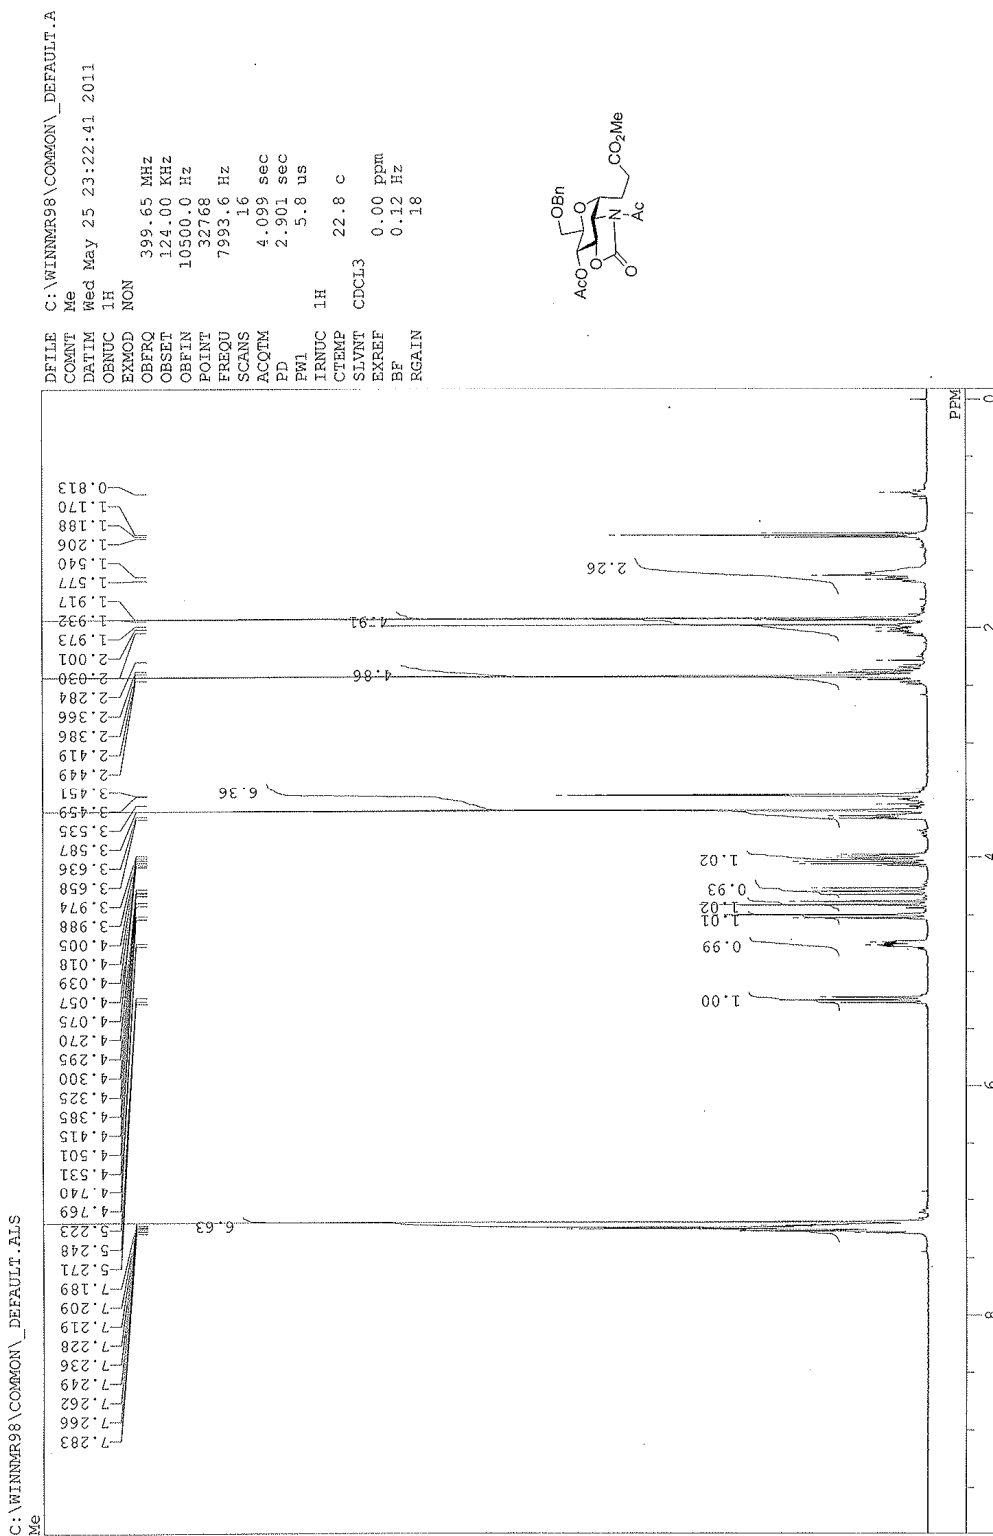

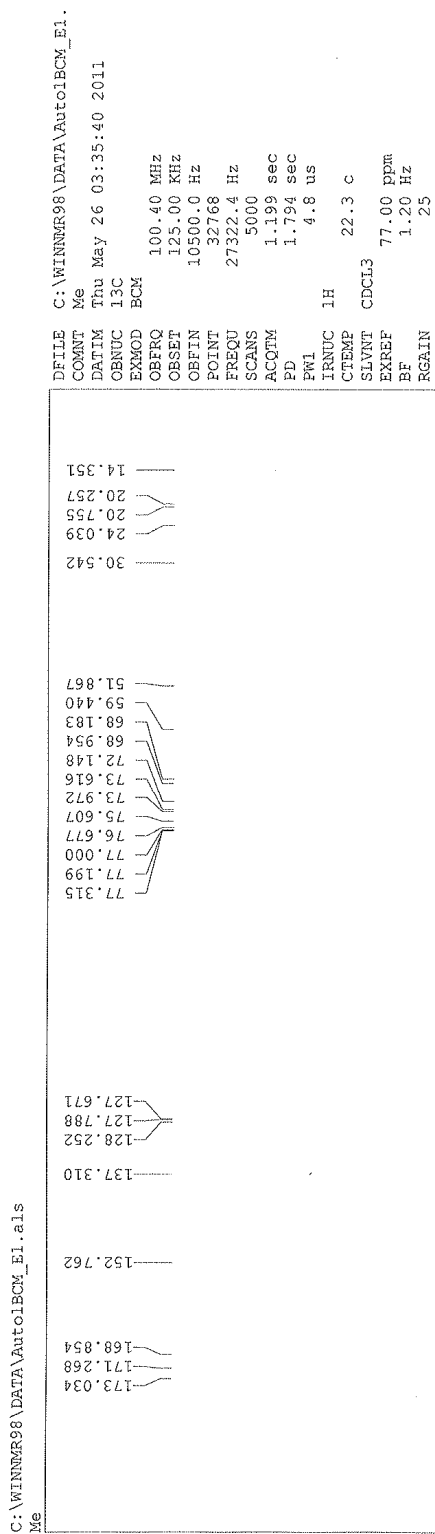

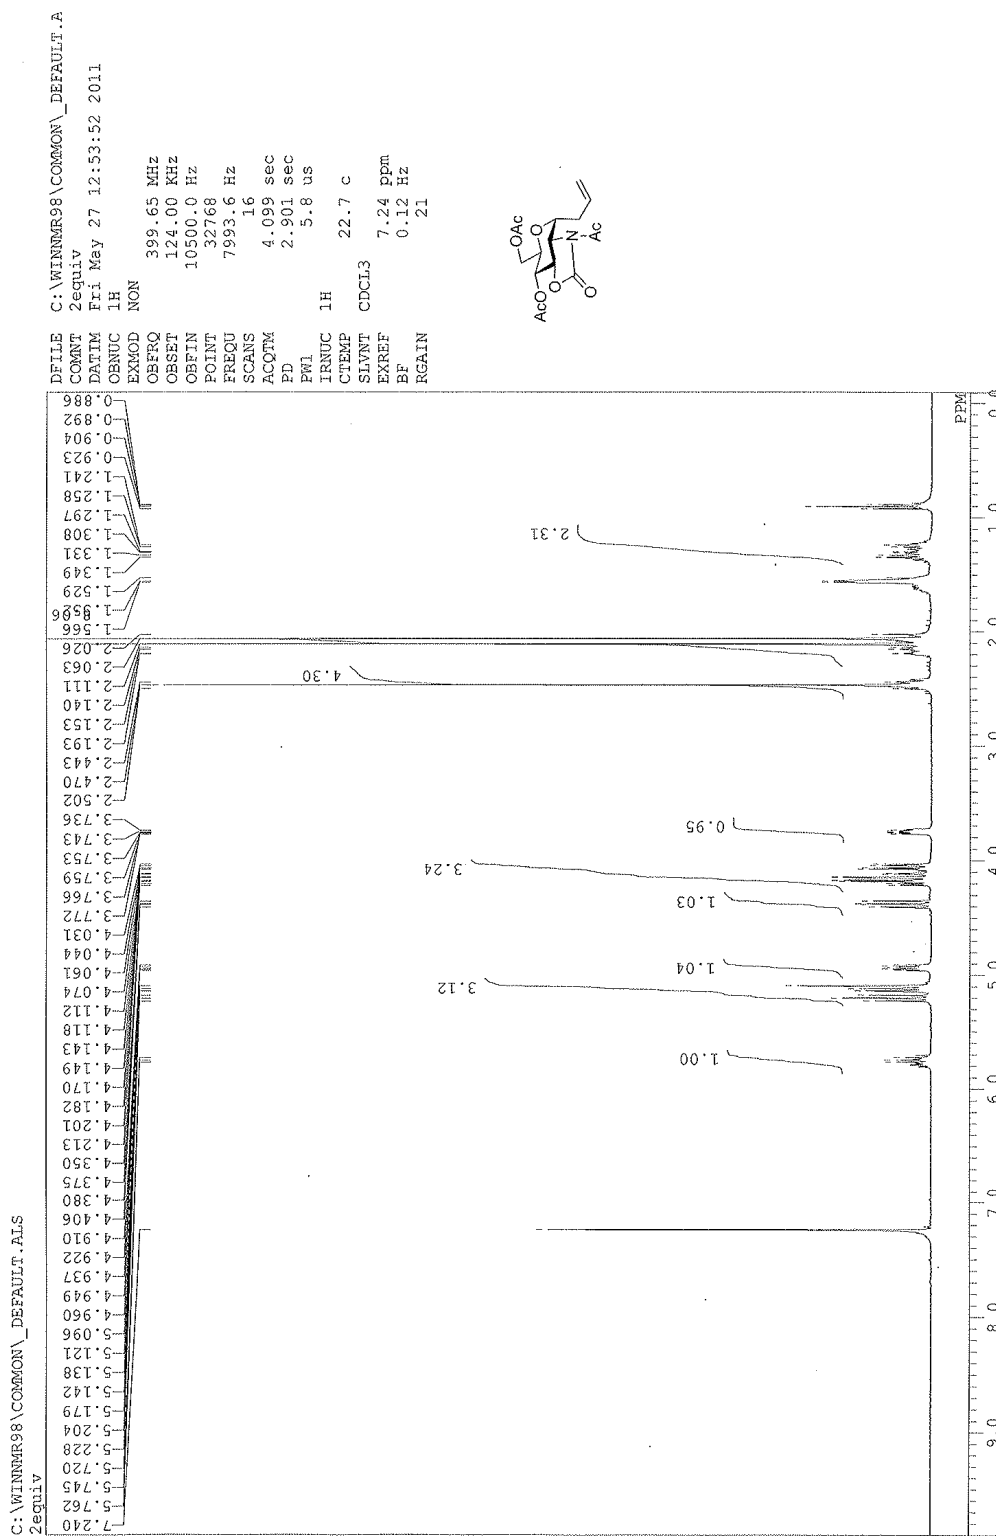

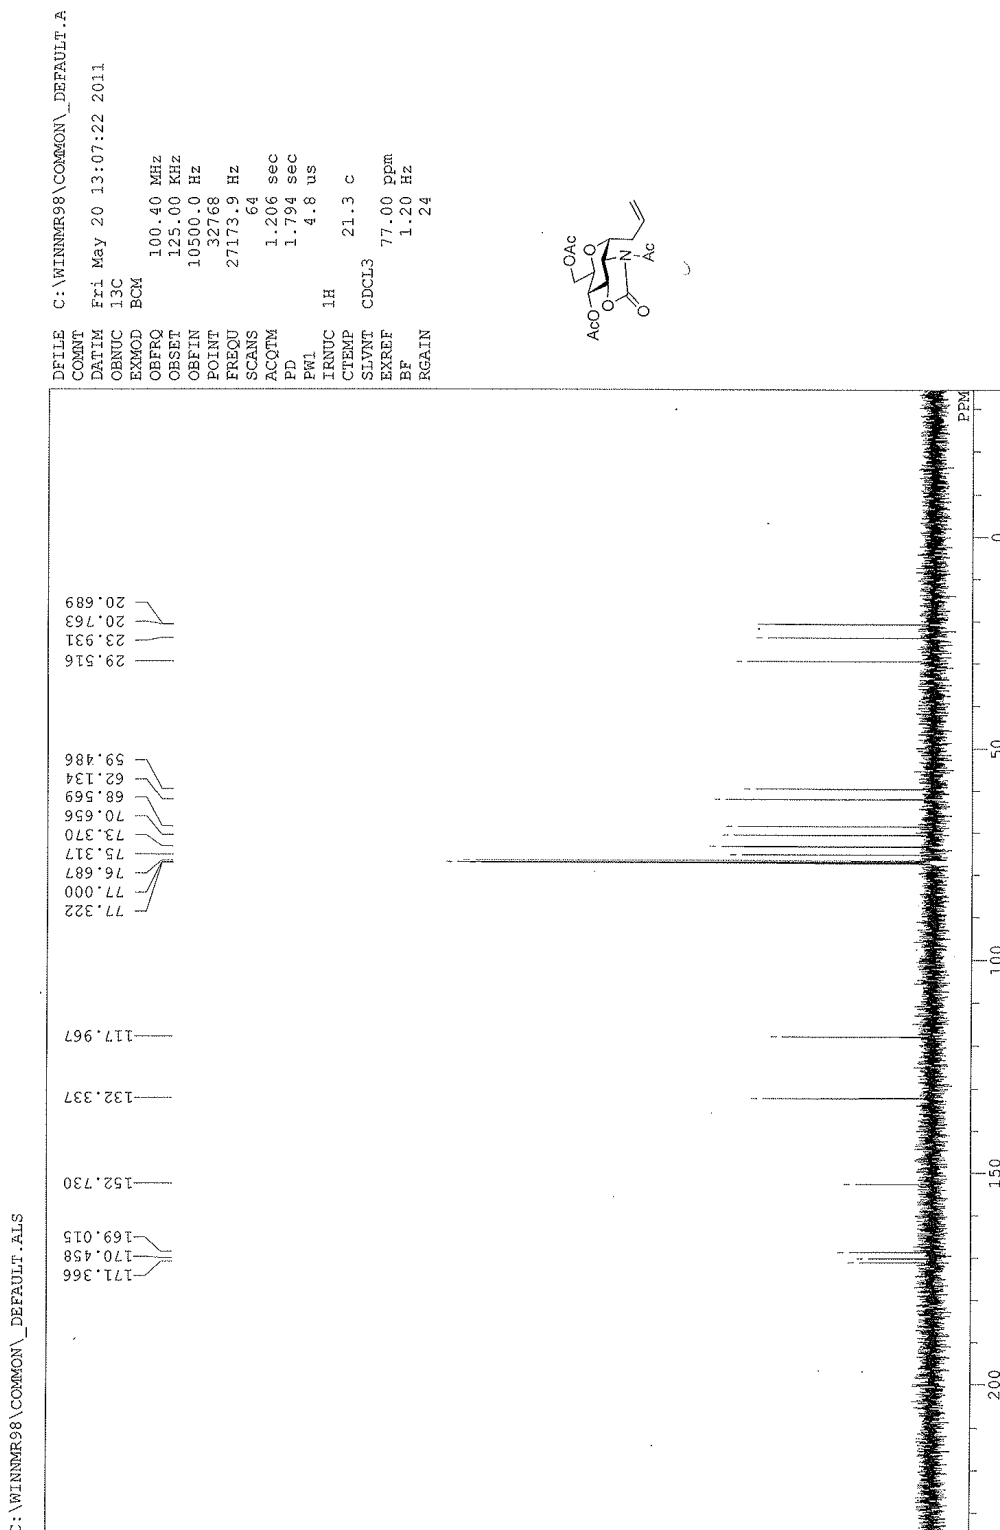

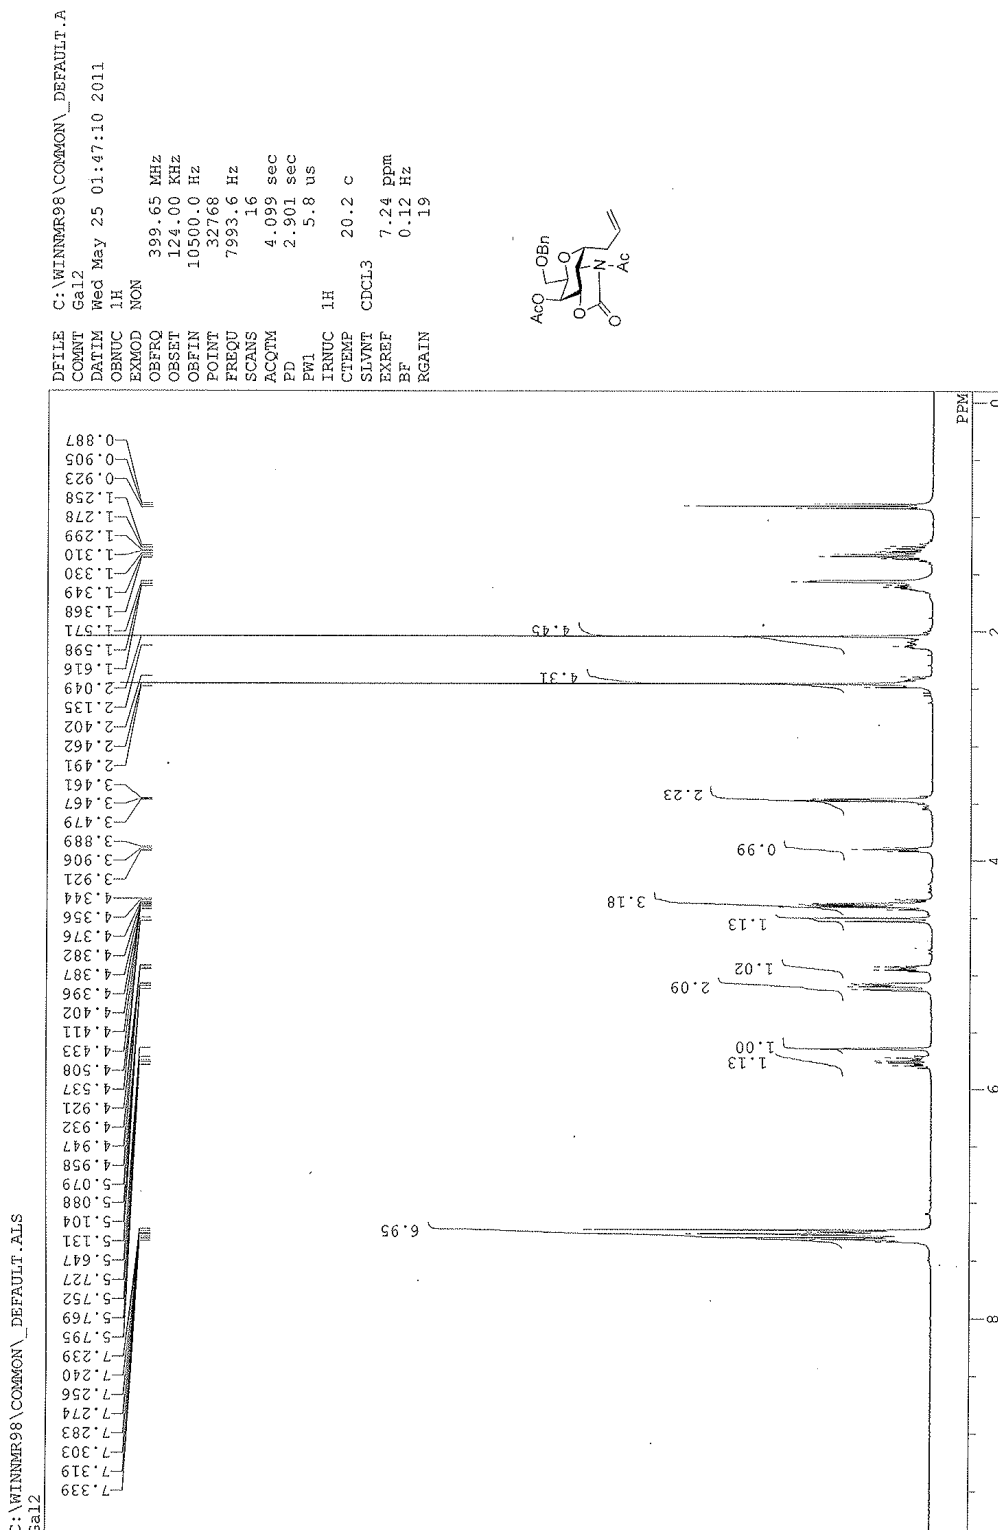

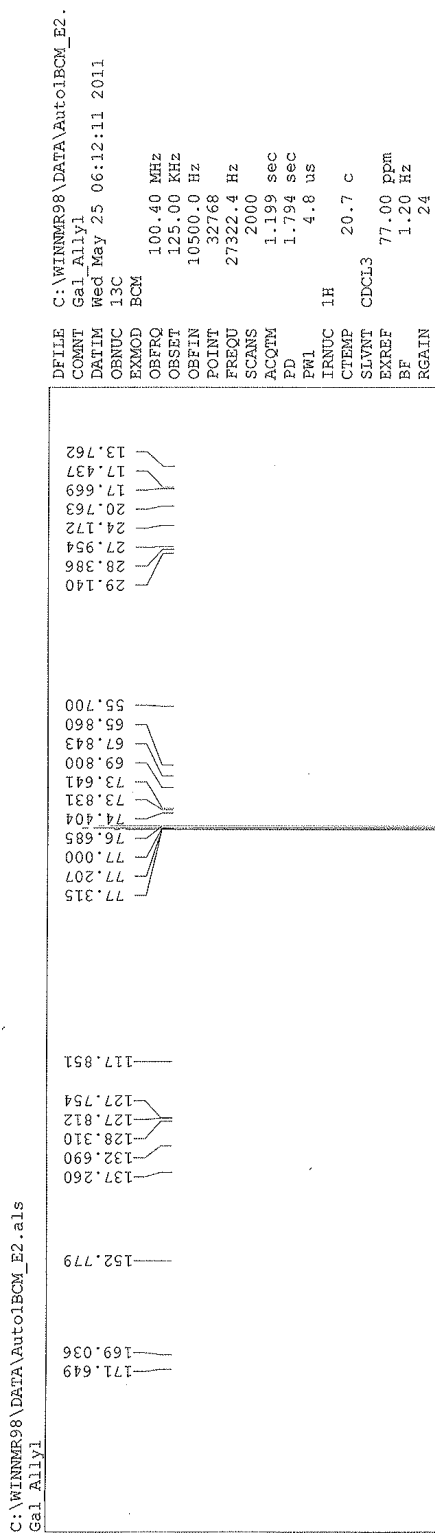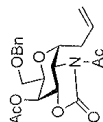

C:\WINNMR8\COMMON\\_DEFAULT.ALS

C:\WINNMR8\COMMON\\_DEFAULT.A  
 DFILE  
 COMNT  
 DATIM Fri May 27 13:04:53 2011  
 OBNUC 1H  
 EXMOD NON  
 OBFRQ 399.65 MHz  
 OBSST 124.00 KHz  
 OBRIN 10500.0 Hz  
 POINT 32768  
 FREQU 7993.6 Hz  
 SCANS 12  
 ACQTM 4.099 sec  
 PD 2.901 sec  
 FWI 5.8 us  
 IRNUC 1H  
 CTEMP 22.9 c  
 SLYNT CDCL3  
 EXREF 7.24 ppm  
 EF 0.12 Hz  
 RGAIN 19

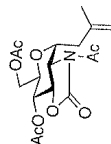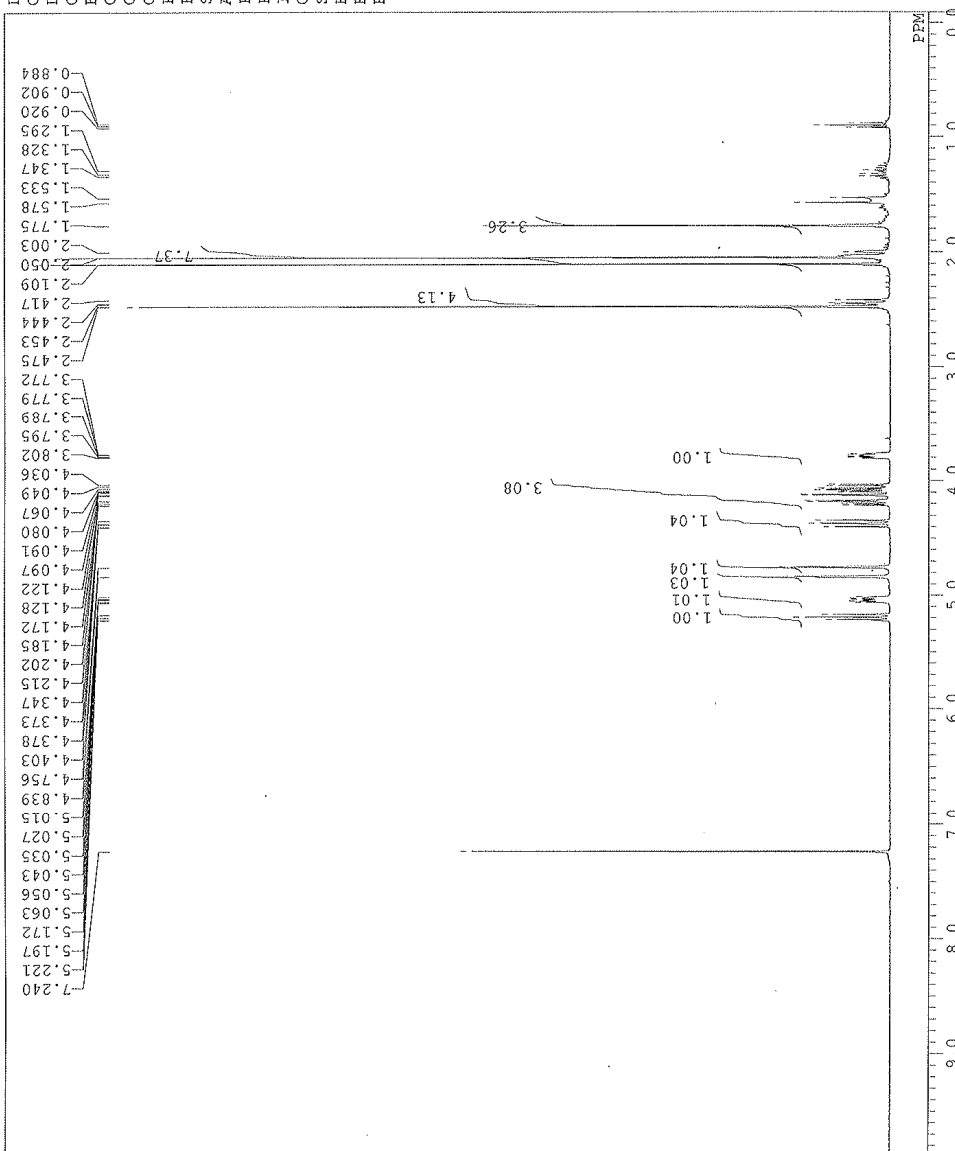



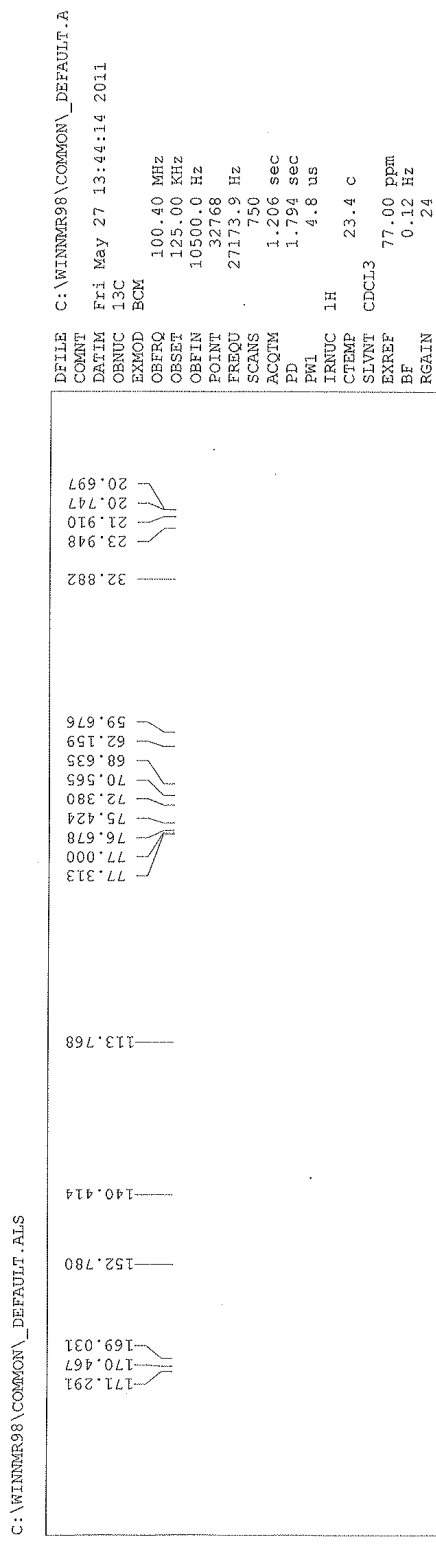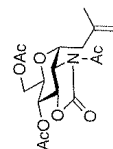



C:\WINNR98\DATA\Auto1BCM\_E1\_FT.a1s  
Bn\_Ac\_Allyl

DFILE C:\WINNR98\DATA\Auto1BCM\_E1\_  
COMNT Bn\_Ac\_Allyl  
DATIM Wed May 25 04:25:03 2011  
OBNUC 13C  
EXMOD BCM  
OBFRQ 100.40 MHz  
OBSET 125.00 KHz  
OBFIN 10500.0 Hz  
POINT 32768  
FREQU 27322.4 Hz  
SCANS 3000  
ACQTM 1.199 sec  
PD 1.794 sec  
PWI 4.8 us  
IRNUC 1H  
CTEMP 21.6 c  
SLVNT CDCl3  
EXREF 77.00 ppm  
BF 1.20 Hz  
RGAIN 25

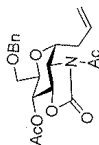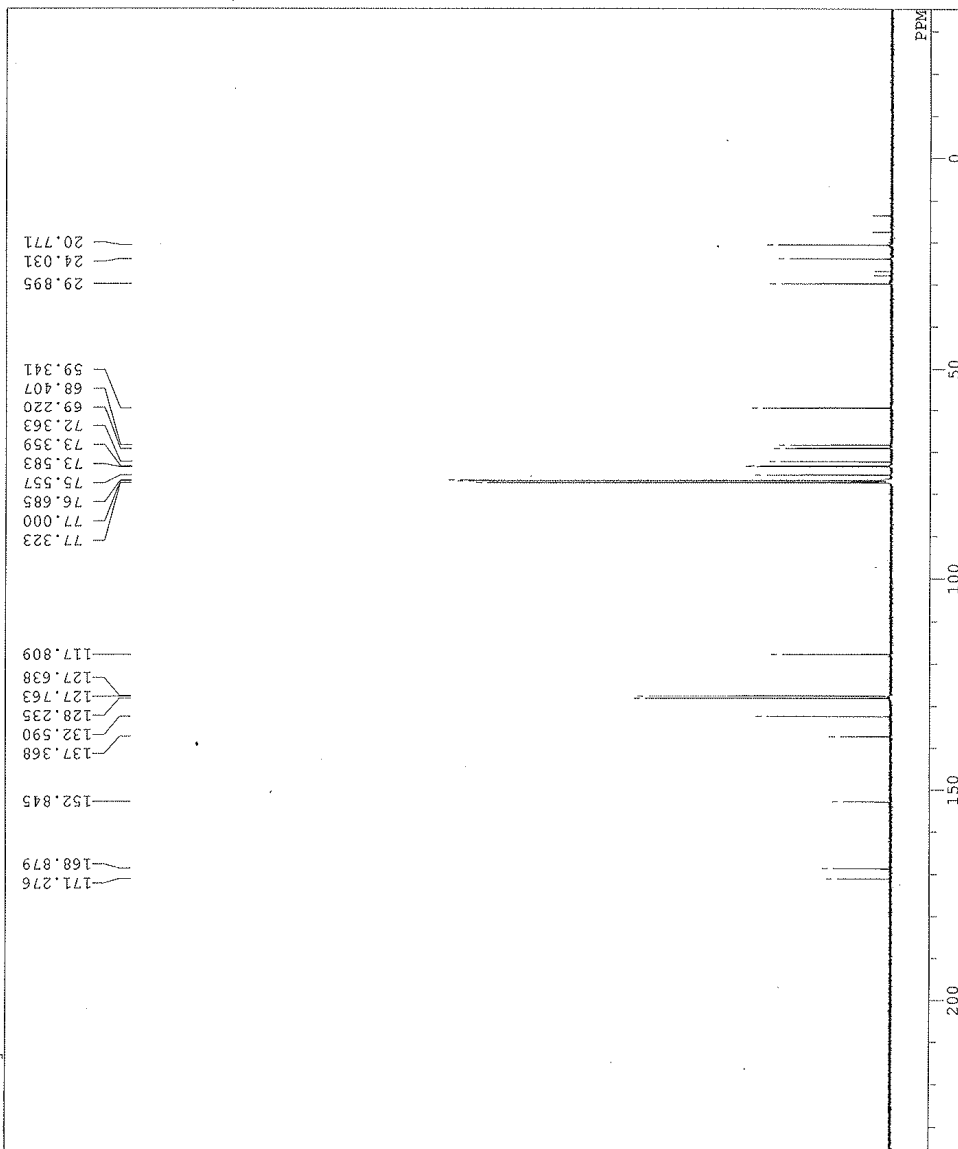

Supplement: c1cc13172a.pdf [file c1cc13172a.pdf]
